# Supplementary material for: (2-Pyridyloxy)arsines as ligands in transition metal chemistry: a stepwise As(iii) → As(ii) → As(i) reduction
Source: Royal Society of Chemistry journal article supplement (doi:10.1039/d0dt01538e), 2020-01-01
Supplement: d0dt01538e1.pdf [file d0dt01538e1.pdf]

# (2-Pyridyloxy)arsines as Ligands in Transition Metal Chemistry: A Stepwise As(III)→As(II)→As(I) Reduction

*Robert Gericke, Jörg Wagler*

Institut für Anorganische Chemie, Technische Universität Bergakademie Freiberg, D-09596 Freiberg, Germany.

## Supporting Information:

Content:

- NMR spectra of compound **1**, **2**, **3**, **5**, **6**, and **7**
- Transition states of the interconversion of **1<sup>II</sup>** into **1<sup>I</sup>**
- NMR spectra of the reaction mixture of the reaction of **2** with [RuCl<sub>2</sub>(PPh<sub>3</sub>)<sub>3</sub>]
- Single-crystal X-ray structure overlay of [PhP(μ-PyO)<sub>2</sub>RuCl<sub>2</sub>(PPh<sub>3</sub>)] and [PhAs(μ-PyO)<sub>2</sub>RuCl<sub>2</sub>(PPh<sub>3</sub>)] (**3**)
- Parameters of single-crystal X-ray diffraction data collection and structure refinement
- Additional NBO/NLMO representations
- Atomic coordinates of gas phase optimized molecular structures

- NMR spectra of compound **1**, **2**, **3**, **5**, **6**, and **7**

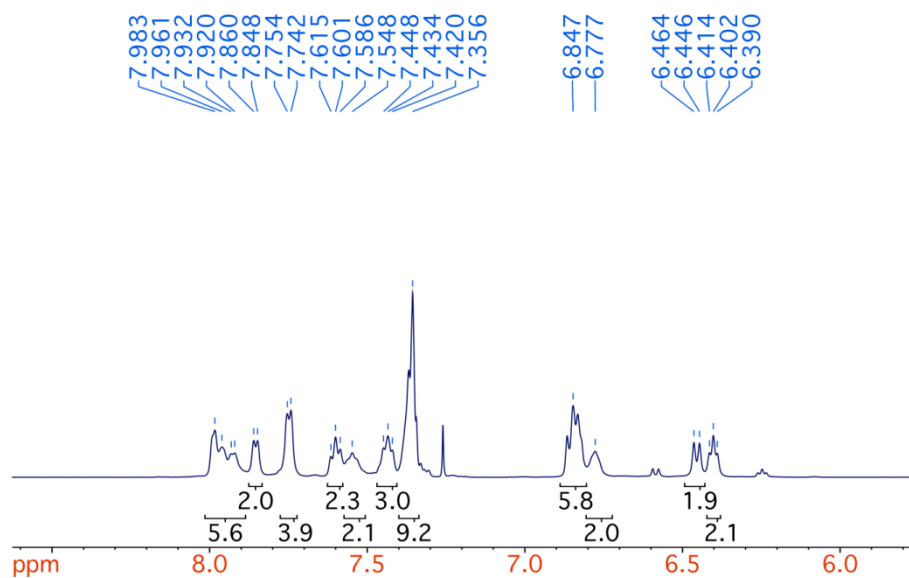

**Figure S1.**  $^1\text{H}$  NMR spectrum of **1** in  $\text{CDCl}_3$ .

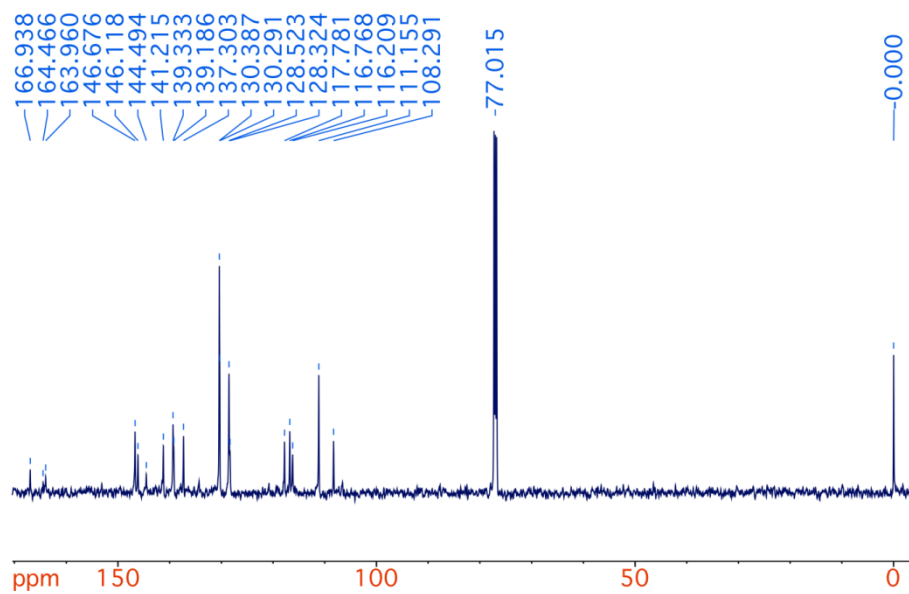

**Figure S2.**  $^{13}\text{C}\{^1\text{H}\}$  NMR spectrum of **1** in  $\text{CDCl}_3$ .

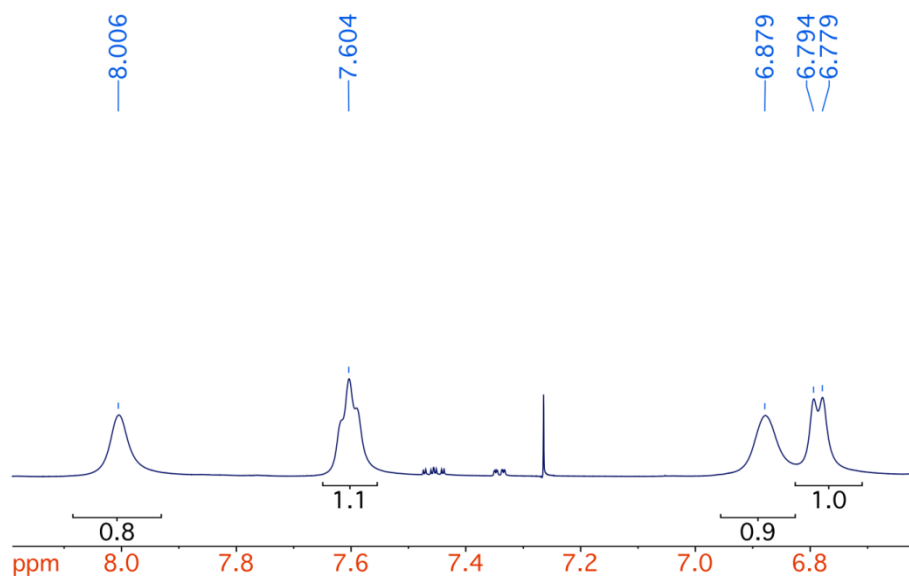

**Figure S3.**  $^1\text{H}$  NMR spectrum of **2** in  $\text{CDCl}_3$ .

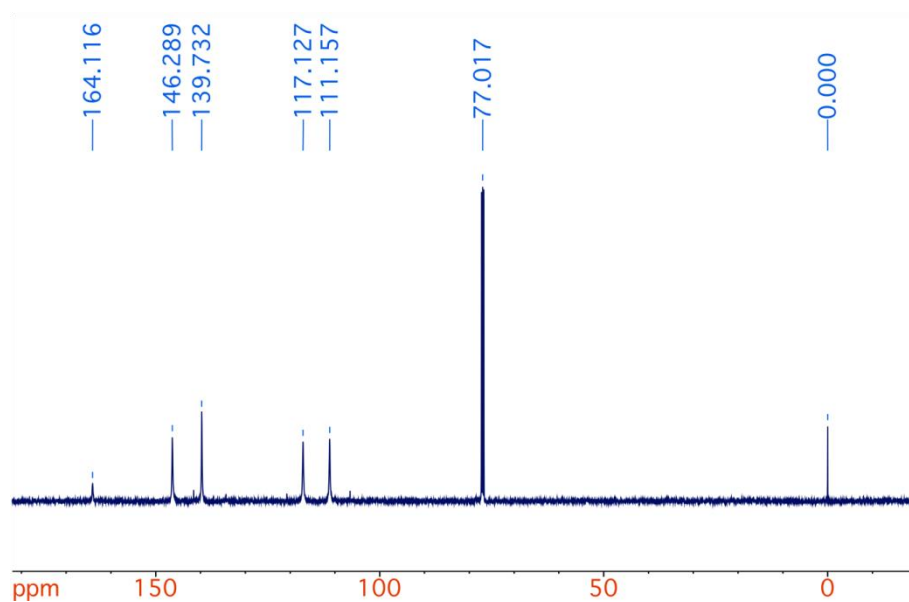

**Figure S4.**  $^{13}\text{C}\{^1\text{H}\}$  NMR spectrum of **2** in  $\text{CDCl}_3$ .

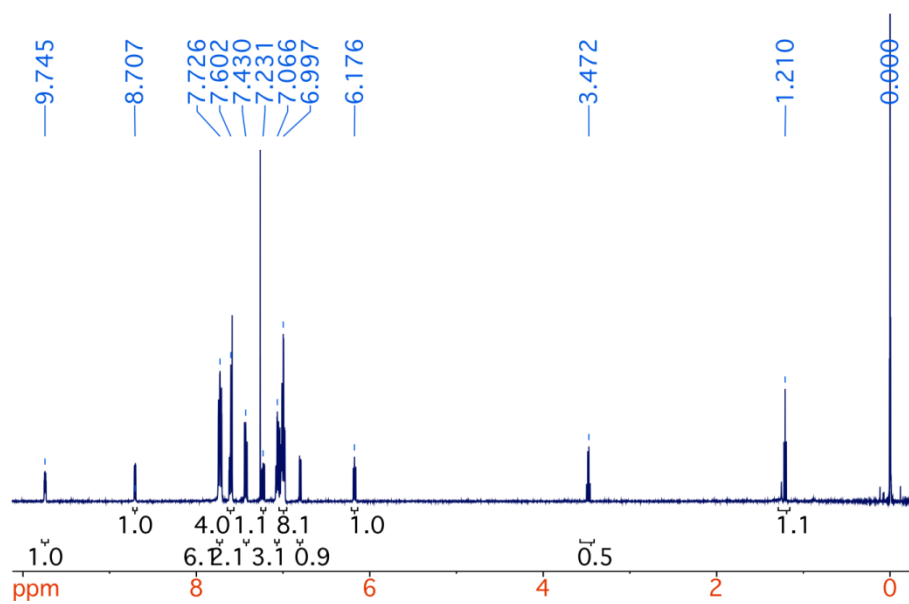

Figure S5.  $^1\text{H}$  NMR spectrum of **3** in  $\text{CDCl}_3$ .

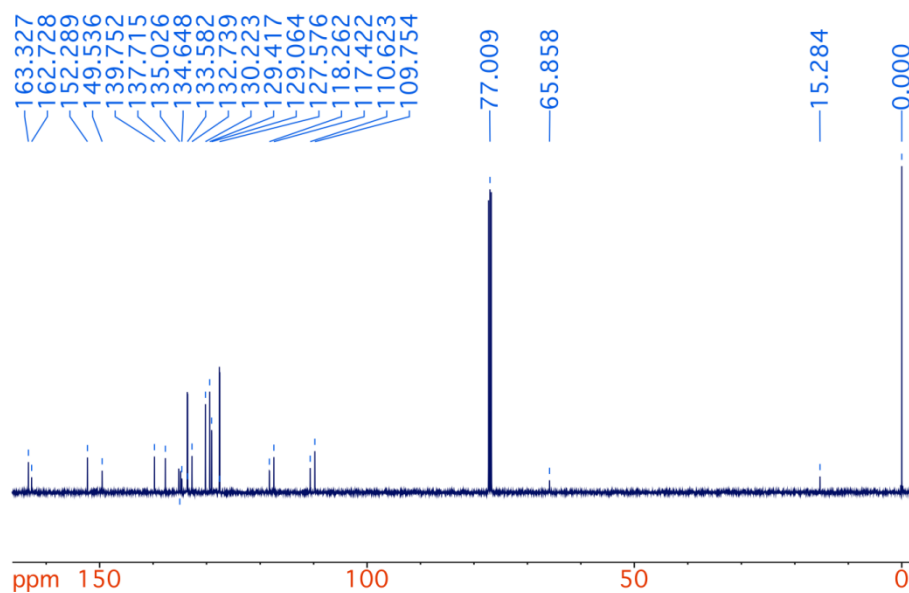

Figure S6.  $^{13}\text{C}\{^1\text{H}\}$  NMR spectrum of **3** in  $\text{CDCl}_3$ .

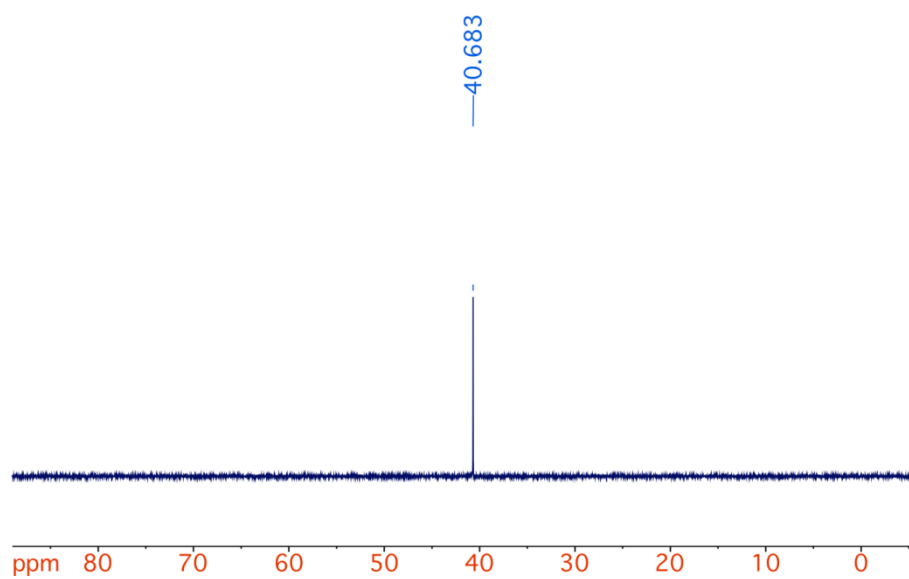

**Figure S7.**  $^{31}\text{P}\{^1\text{H}\}$  NMR spectrum of **3** in  $\text{CDCl}_3$ .

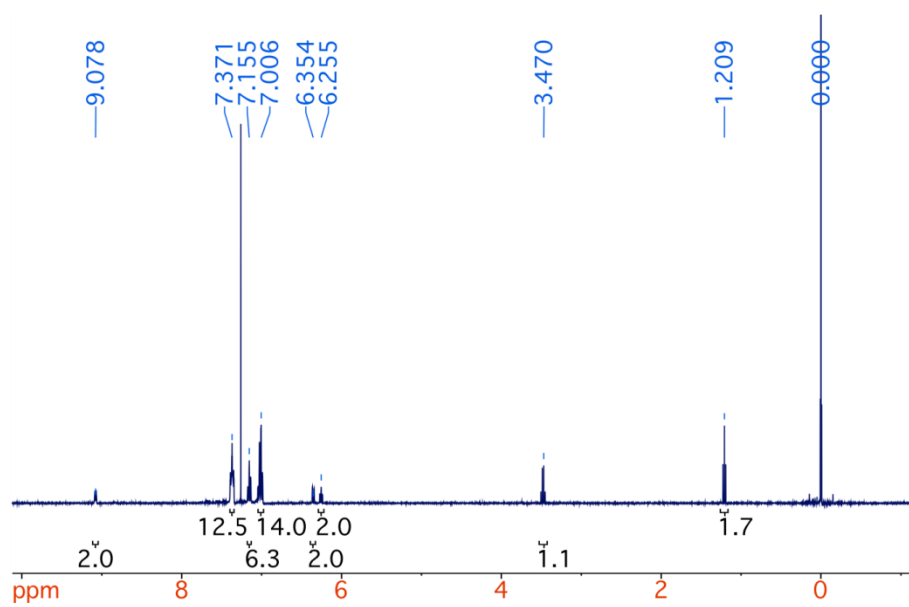

**Figure S8.**  $^1\text{H}$  NMR spectrum of **5** in  $\text{CDCl}_3$ .

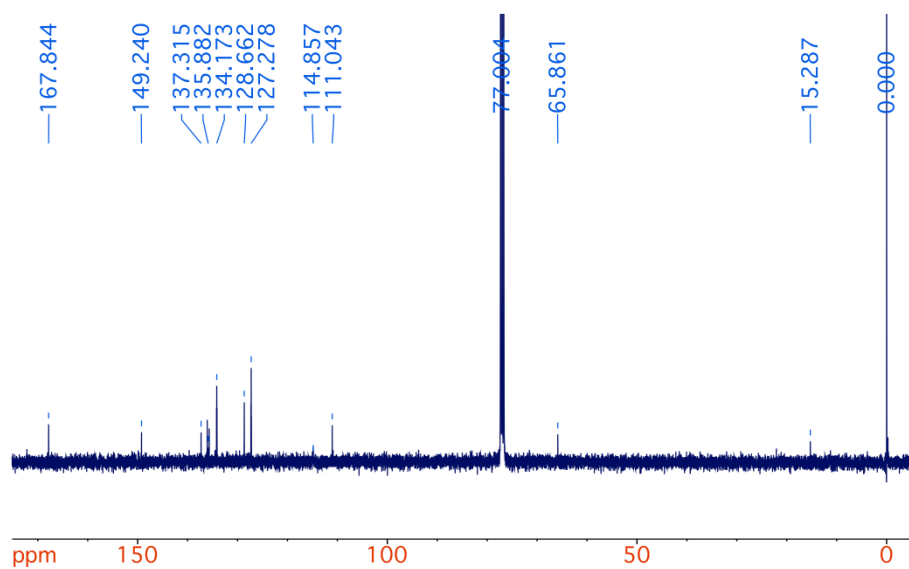

**Figure S9.**  $^{13}\text{C}\{^1\text{H}\}$  NMR spectrum of **5** in  $\text{CDCl}_3$ .

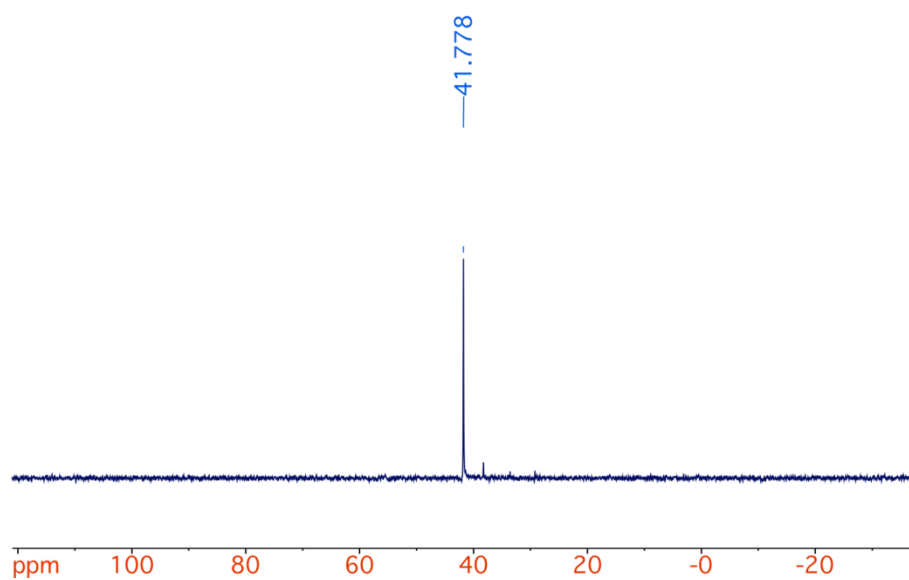

**Figure S10.**  $^{31}\text{P}\{^1\text{H}\}$  NMR spectrum of **5** in  $\text{CDCl}_3$ .

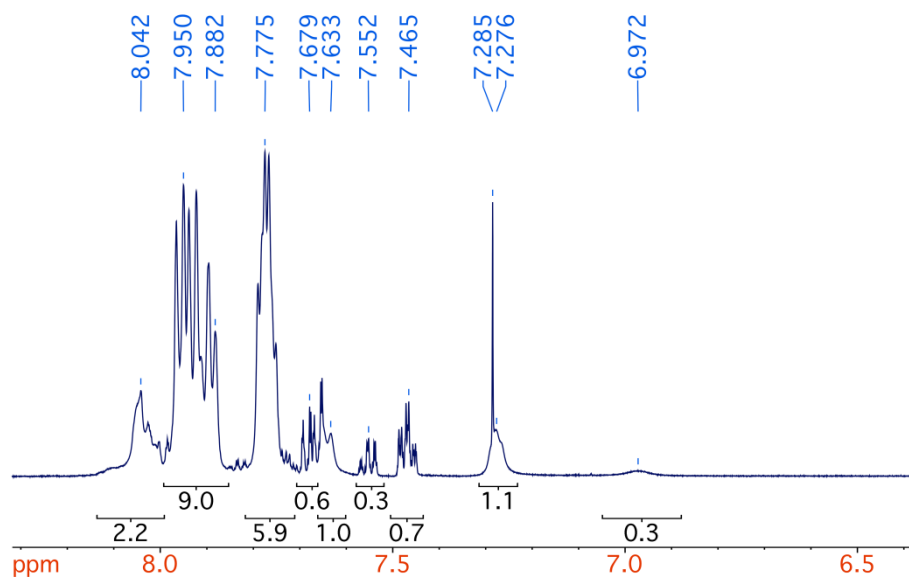

**Figure S11.**  $^1\text{H}$  NMR spectrum of **6** in  $\text{CDCl}_3$ .

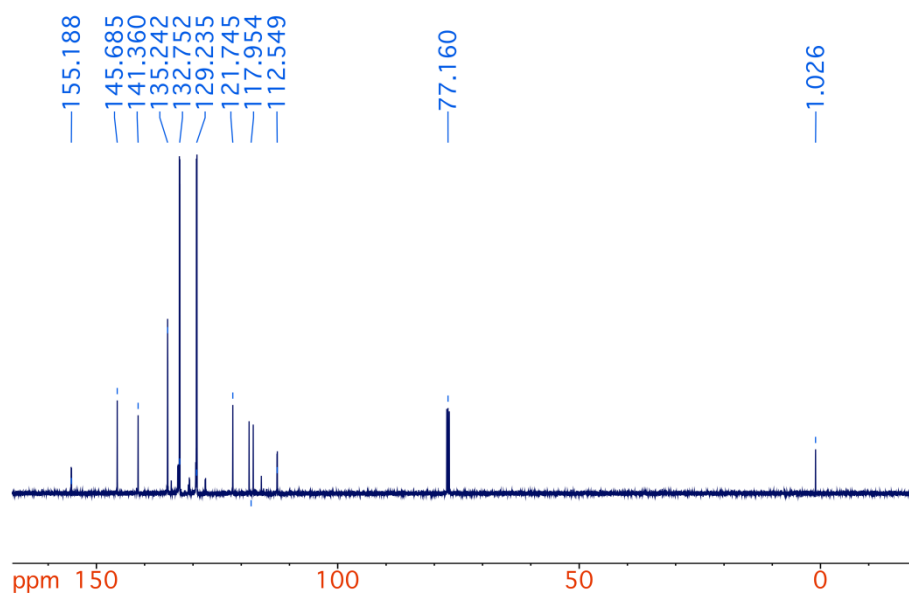

**Figure S12.**  $^{13}\text{C}\{^1\text{H}\}$  NMR spectrum of **6** in  $\text{CDCl}_3$ .

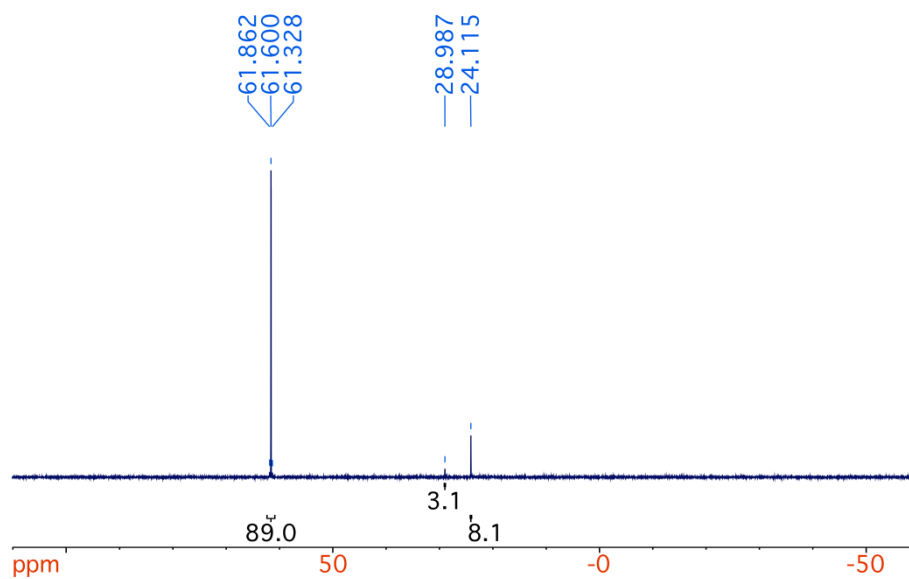

**Figure S13.**  $^{31}\text{P}\{^1\text{H}\}$  NMR spectrum of **6** in  $\text{CDCl}_3$ .

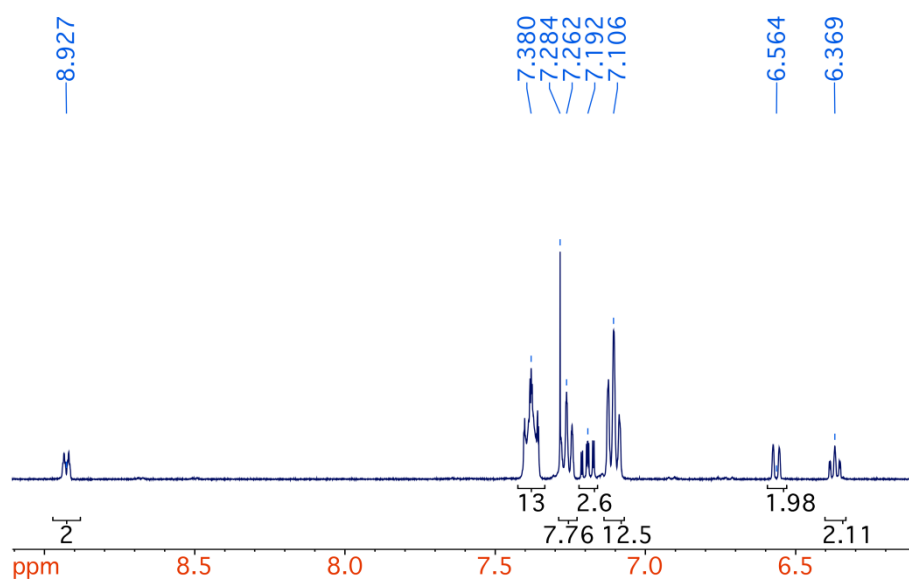

**Figure S14.**  $^1\text{H}$  NMR spectrum of **7** in  $\text{CDCl}_3$ .



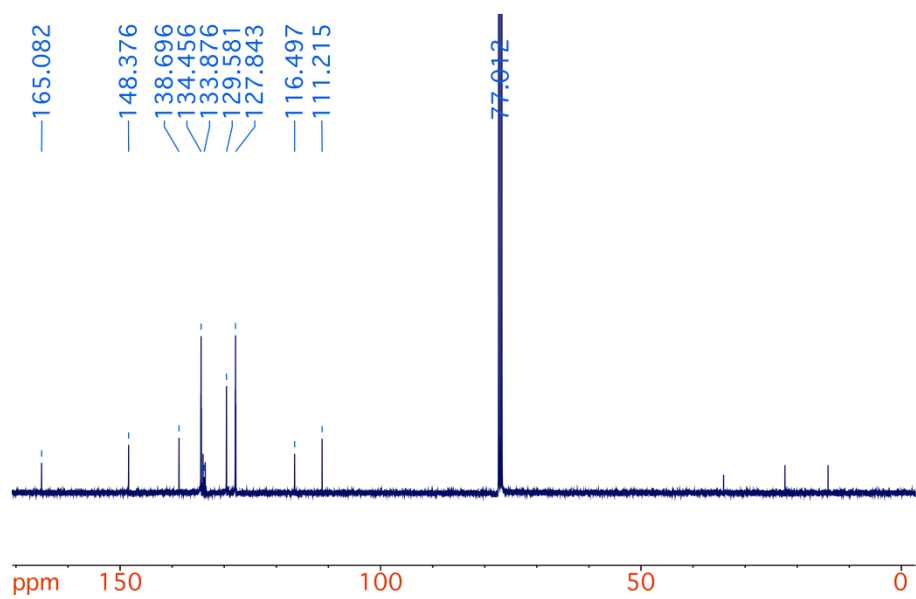

**Figure S15.**  $^{13}\text{C}\{^1\text{H}\}$  NMR spectrum of **7** in  $\text{CDCl}_3$ .

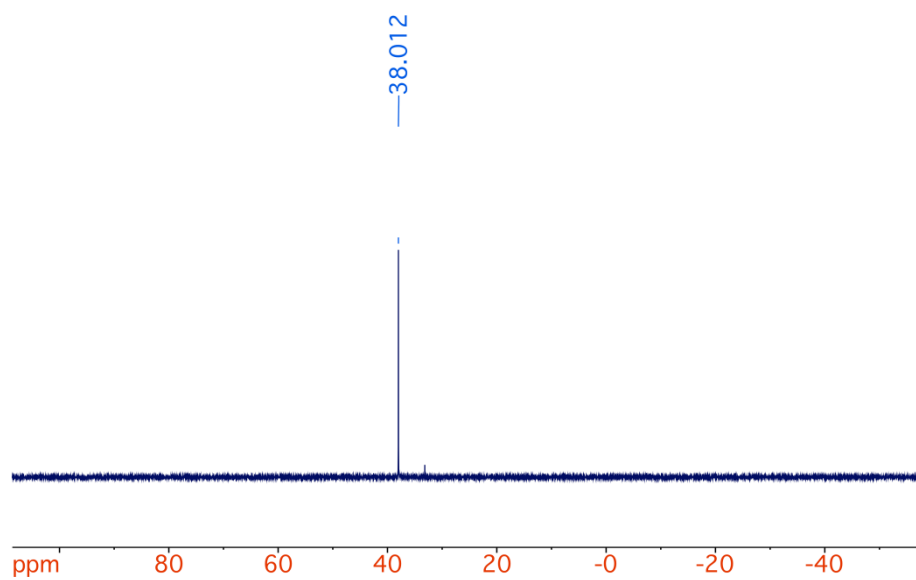

**Figure S16.**  $^{31}\text{P}\{^1\text{H}\}$  NMR spectrum of **7** in  $\text{CDCl}_3$ .

- Transition state of the interconversion of  $\mathbf{1}^H$  and  $\mathbf{1}^I$

To find the transition state of the conversion of  $\mathbf{1}^H$  into  $\mathbf{1}^I$  the calculation was started from the optimized structure of  $\mathbf{1}^H$  at DFT-PBEPBE cc-pVTZ/SDD(As)-D3BJ level of theory in the gas phase. A 360°-scan (in 10° steps) of the dihedral angle O-As-N-C<sub>2</sub> (i.e., rotation of the pyridyloxy ligand about the As-N-bond) was performed. The energy profile is depicted in figure S17 and shows the lowest energy as well as shortest As•••O separation of the non-bonding O atom of the pyridyloxy ligand to be at an O-As-N-C<sub>2</sub> dihedral angle of  $\approx 180^\circ$  (thermodynamically stable form of  $\mathbf{1}^H$ ). A scan of the As•••O separation of the non-bonding O atom of the pyridyloxy ligand starting at O-As-N-C<sub>2</sub> dihedral angle of  $\approx 180^\circ$  in the range 2.6-1.7 Å shows only a chelating coordination of the PyO ligand rather than a switch of the As-N toward an As-O bonding mode (Figure 18). Therefore, a scan of the As•••N separation of the bonding N atom of the pyridyloxy ligand at O-As-N-C<sub>2</sub> dihedral angle of  $\approx 180^\circ$  in the range 2.0-2.8 Å was performed (Figure S19). At an As-N separation between 2.3-2.4 Å a switch from As-N to As-O bonding was detected. The optimization of the transition state starting from this geometry (As•••N: 2.3 Å) was performed. Frequency calculation at the optimized transition state shows one negative mode assigned to the As-N vs. As-O bonding mode (TS1:  $\Delta G^\ddagger = 25.03 \text{ kcal mol}^{-1}$ ).

The nudged elastic band (NEB) method,<sup>1</sup> as implemented in ORCA, was used to verify if TS1 is the lowest transition state. Starting and end point were set as  $\mathbf{1}^H$  and  $\mathbf{1}^I$ , respectively and the minimum energy path was optimized with 10 steps. It was found, that a switch between As-N and As-O bonding occurs at an O-As-N-C<sub>2</sub> dihedral angle between 72.6° and 96.0° (Figure S20). Starting from the NEB results, the optimization of the transition state was performed. Frequency calculation at the optimized transition state shows one negative mode assigned to the As-N vs. As-O bonding mode (TS2:  $\Delta G^\ddagger = 23.44 \text{ kcal mol}^{-1}$ ). The Gibbs free energy profile regarding TS2 of the interconversion of  $\mathbf{1}^H$  into  $\mathbf{1}^I$  is given in figure S21 and compared with its phosphorus analogue, which was treated in a similar manner.

Additional for PhAs(PyO)<sub>2</sub>, geometry optimization followed by frequency calculation of  $\mathbf{1}^I$ ,  $\mathbf{1}^H$  and the transition state TS2 of the isomerization were performed at DFT-B3LYP cc-pVTZ/SDD(As)-D3BJ level of theory in the gas phase (red, figure S22) and including solvent effects (chloroform) using the Conductor like Screening Model (COSMO; blue, figure S22).<sup>2</sup> Atomic radii<sup>3</sup> have been used as reported (1.350 (H), 1.700 (C), 1.608 (N), 1.517 (O), and 1.967 Å (As)). A dielectric constant of 4.8 and solvent probe radius of 3.17 Å was used for chloroform. The  $f(\epsilon)$  scaling was set to 0.9057 as described by Klamt et al..<sup>4</sup>

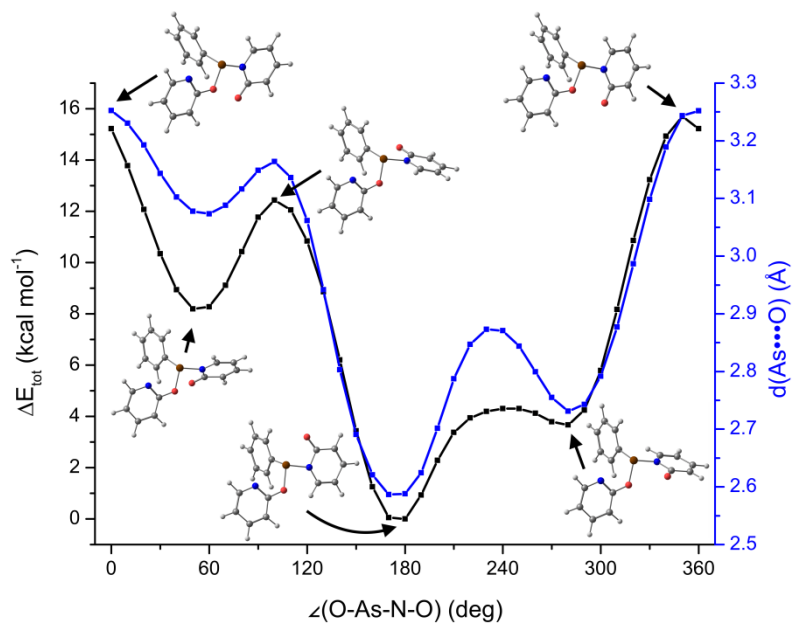

**Figure S17.** The dihedral angle O-As-N-C<sub>2</sub> was scanned in 10° steps of rotation about the As-N bond from 0-360°. The total energy profile (black) and As...O separation of the non-bonding O atom (blue) is depicted.

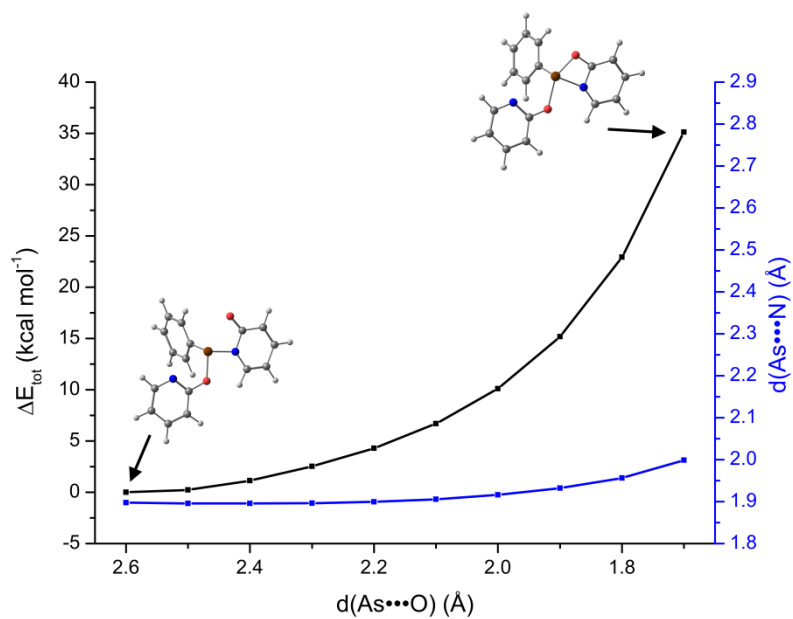

**Figure S18.** Energy surface scan of the As...O separation of the non-bonding O atom.

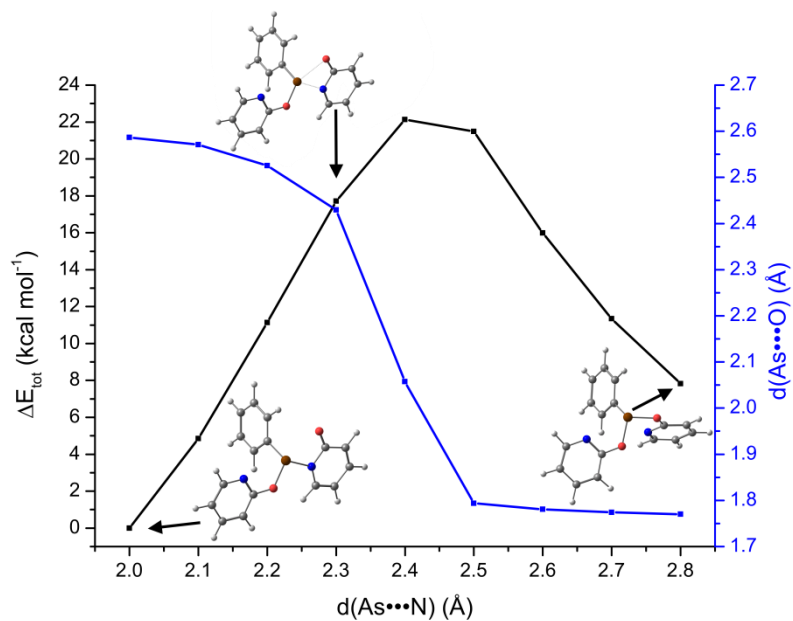

**Figure S19.** Energy surface scan of the As...N separation of the As-N bound PyO.

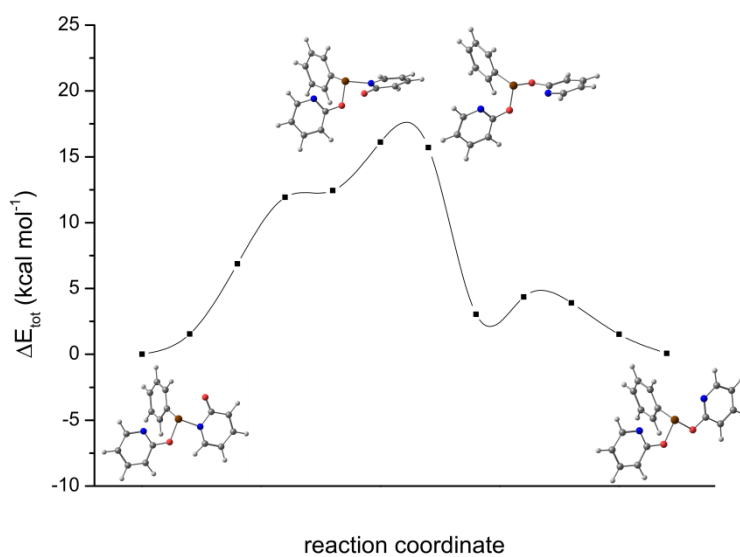

**Figure S20.** Energy profile of the NEB calculation of the isomerization of isomer  $1''$  into isomer  $1'$  for  $\text{PhAs}(\text{PyO})_2$ .

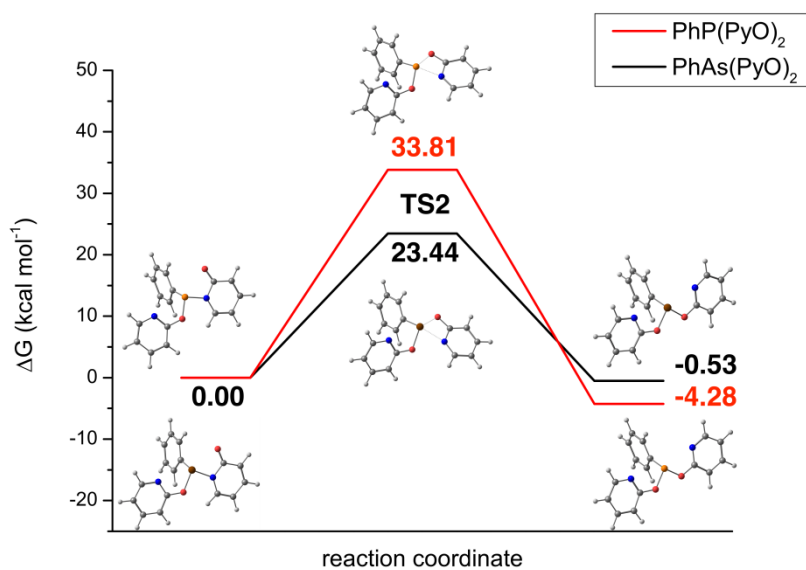

**Figure S21.** Gibbs free energy plots for the transition state TS2 of the isomerization of isomer  $1^{II}$  into isomer  $1^I$  for PhP(PyO)<sub>2</sub> (red) and PhAs(PyO)<sub>2</sub> (black).  $\Delta G$  is referenced to  $1^{II}$  (0.00 kcal mol<sup>-1</sup>) or  $As1^{II}$  (0.00 kcal mol<sup>-1</sup>), respectively.  $G$  is obtained from frequency calculations at 293.15 K and values are given in kcal mol<sup>-1</sup>.

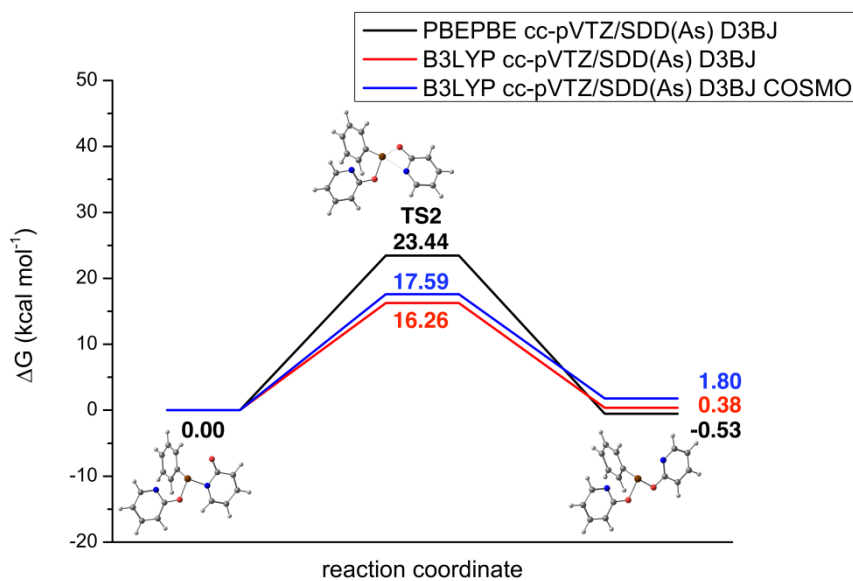

**Figure S22.** Gibbs free energy plots for the transition state TS2 of the isomerization of isomer  $1^{II}$  into isomer  $1^I$  for PhAs(PyO)<sub>2</sub> at different level of theory.  $\Delta G$  is referenced to  $As1^{II}$  (0.00 kcal mol<sup>-1</sup>), respectively.  $G$  is obtained from frequency calculations at 293.15 K and values are given in kcal mol<sup>-1</sup>.

- NMR spectra of the reaction mixture of the reaction of **2** with  $[\text{RuCl}_2(\text{PPh}_3)_3]$

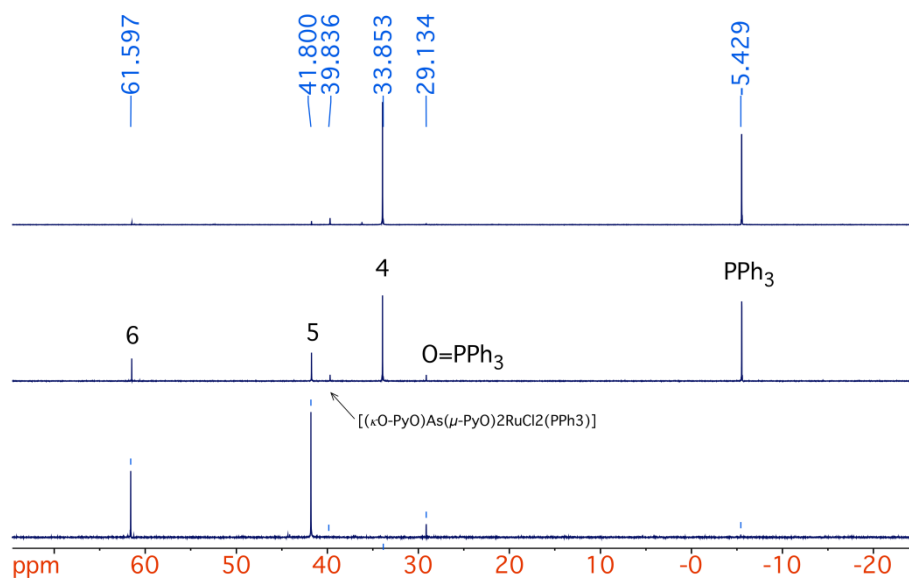

**Figure S23.**  $^{31}\text{P}\{^1\text{H}\}$  NMR spectra of the reaction mixture of **2** with  $[\text{RuCl}_2(\text{PPh}_3)_3]$  in  $\text{CDCl}_3$  (after few minutes – top; after 2 h – middle; after 7 h – bottom).

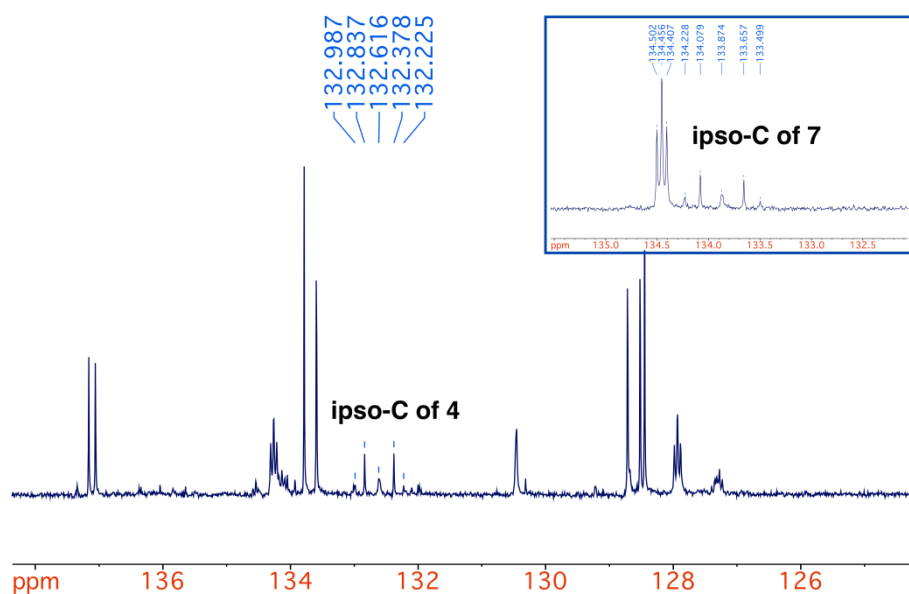

**Figure S24.**  $^{13}\text{C}\{^1\text{H}\}$  NMR spectra of the reaction mixture of **2** with  $[\text{RuCl}_2(\text{PPh}_3)_3]$  in  $\text{CDCl}_3$  after few minutes. The characteristic signal of the *ipso*-C atoms of the phenyl groups in a *cis*- $\text{Ph}_3\text{P-Ru-PPh}_3$  arrangement is highlighted. The inset shows the NMR signal of the *ipso*-C atoms of the phenyl groups in the *cis*- $\text{Ph}_3\text{P-Ru-PPh}_3$  moiety in compound **7** for comparison.

- Single-crystal X-ray structure overlay of  $[\text{PhP}(\mu\text{-PyO})_2\text{RuCl}_2(\text{PPh}_3)]$  and  $[\text{PhAs}(\mu\text{-PyO})_2\text{RuCl}_2(\text{PPh}_3)]$  (**3**)

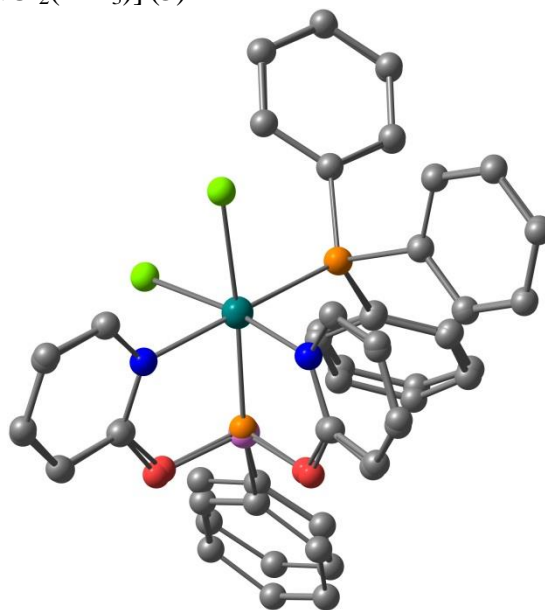

**Figure S25.** Overlay was generated by root-mean-square distances of the  $\text{RuCl}_2\text{N}_2\text{P}$  unit with equal weights on each atom ( $\text{RMSD} = 0.0228 \text{ \AA}$ ). Hydrogen atoms are omitted for clarity.

- Parameters of single-crystal X-ray diffraction data collection and structure refinement

**Table S1.** Parameters of data collection and structure refinement for **1**, **2** and **3**·1.5CHCl<sub>3</sub>.

Data sets were collected at 200 K with Mo  $K_{\alpha}$  radiation using a Stoe IPDS-2T diffractometer. Absorption correction: Integration (*X-SHAPE*). H-atoms were included in the refinement in idealized positions (riding model).

|                                                                            | PhAs(PyO) <sub>2</sub> ( <b>1</b> )                             | As(PyO) <sub>3</sub> ( <b>2</b> )                               | <b>3</b> ·1.5CHCl <sub>3</sub>                                                                              |
|----------------------------------------------------------------------------|-----------------------------------------------------------------|-----------------------------------------------------------------|-------------------------------------------------------------------------------------------------------------|
| Crystal data                                                               |                                                                 |                                                                 |                                                                                                             |
| Chemical formula                                                           | C <sub>16</sub> H <sub>13</sub> AsN <sub>2</sub> O <sub>2</sub> | C <sub>15</sub> H <sub>12</sub> AsN <sub>3</sub> O <sub>3</sub> | C <sub>34</sub> H <sub>28</sub> AsCl <sub>2</sub> N <sub>2</sub> O <sub>2</sub> PRu·1.5(CHCl <sub>3</sub> ) |
| $M_r$                                                                      | 340.20                                                          | 357.20                                                          | 953.49                                                                                                      |
| Crystal system, space group                                                | Triclinic, $P\bar{1}$                                           | Monoclinic, $C2/c$                                              | Triclinic, $P\bar{1}$                                                                                       |
| $a, b, c$ (Å)                                                              | 8.3588(4),<br>9.2389(4),<br>10.3537(5)                          | 32.4502(12),<br>7.2230(3),<br>13.5042(5)                        | 11.7469(5),<br>12.8872(6),<br>16.5916(7)                                                                    |
| $\alpha, \beta, \gamma$ (°)                                                | 85.179(4),<br>73.420(3),<br>70.026(3)                           | 90,<br>108.146(3),<br>90                                        | 107.717(3),<br>105.382(3),<br>115.059(3)                                                                    |
| $V$ (Å <sup>3</sup> )                                                      | 720.16(6)                                                       | 3007.8(2)                                                       | 1928.07(16)                                                                                                 |
| $Z$                                                                        | 2                                                               | 8                                                               | 2                                                                                                           |
| $\mu$ (mm <sup>-1</sup> )                                                  | 2.37                                                            | 2.28                                                            | 1.79                                                                                                        |
| Crystal size (mm)                                                          | 0.45 × 0.38 × 0.15                                              | 0.40 × 0.35 × 0.30                                              | 0.30 × 0.18 × 0.15                                                                                          |
| $T_{\min}, T_{\max}$                                                       | 0.466, 0.740                                                    | 0.542, 0.658                                                    | 0.721, 0.849                                                                                                |
| No. of measured, independent and observed [ $I > 2\sigma(I)$ ] reflections | 18924, 3465, 3298                                               | 19975, 3338, 3005                                               | 22790, 9315, 7827                                                                                           |
| $R_{\text{int}}$                                                           | 0.058                                                           | 0.043                                                           | 0.038                                                                                                       |
| $(\sin \theta/\lambda)_{\text{max}}$ (Å <sup>-1</sup> )                    | 0.661                                                           | 0.643                                                           | 0.660                                                                                                       |
| $R[F^2 > 2\sigma(F^2)], wR(F^2), S$                                        | 0.026, 0.067, 1.11                                              | 0.047, 0.095, 1.26                                              | 0.040, 0.097, 1.09                                                                                          |
| No. of reflections                                                         | 3465                                                            | 3338                                                            | 9315                                                                                                        |
| No. of parameters                                                          | 191                                                             | 296                                                             | 501                                                                                                         |
| No. of restraints                                                          | 0                                                               | 36                                                              | 104                                                                                                         |
| $\Delta\rho_{\text{max}}, \Delta\rho_{\text{min}}$ (e Å <sup>-3</sup> )    | 0.39, -0.70                                                     | 0.22, -0.37                                                     | 0.56, -0.78                                                                                                 |



**Table S2.** Parameters of data collection and structure refinement for **5**·2CHCl<sub>3</sub>, **6** and **7**·CHCl<sub>3</sub>.

Data sets were collected at 200 K with Mo  $K_{\alpha}$  radiation using a Stoe IPDS-2T diffractometer. Absorption correction: Integration (*X-SHAPE*). H-atoms were included in the refinement in idealized positions (riding model).

|                                                                            | <b>5</b> ·2CHCl <sub>3</sub>                                                                              | <b>6</b>                                                                                                                            | <b>7</b> ·CHCl <sub>3</sub>                                                                                           |
|----------------------------------------------------------------------------|-----------------------------------------------------------------------------------------------------------|-------------------------------------------------------------------------------------------------------------------------------------|-----------------------------------------------------------------------------------------------------------------------|
| Crystal data                                                               |                                                                                                           |                                                                                                                                     |                                                                                                                       |
| Chemical formula                                                           | C <sub>46</sub> H <sub>38</sub> AsClN <sub>2</sub> O <sub>2</sub> P <sub>2</sub> Ru·2(CHCl <sub>3</sub> ) | C <sub>23</sub> H <sub>19</sub> NOP·Cl                                                                                              | C <sub>46</sub> H <sub>38</sub> AsAuCl <sub>2</sub> N <sub>2</sub> O <sub>2</sub> P <sub>2</sub> Ru·CHCl <sub>3</sub> |
| $M_r$                                                                      | 1162.90                                                                                                   | 391.81                                                                                                                              | 1275.95                                                                                                               |
| Crystal system, space group                                                | Triclinic, $P\bar{1}$                                                                                     | Hexagonal, $P6_1$                                                                                                                   | Triclinic, $P\bar{1}$                                                                                                 |
| $a, b, c$ (Å)                                                              | 16.0117(5),<br>17.9816(5),<br>20.4442(6)                                                                  | 9.3905(2),<br>9.3905(2),<br>40.1802(17)                                                                                             | 12.3889(6),<br>12.8306(6),<br>15.0564(7)                                                                              |
| $\alpha, \beta, \gamma$ (°)                                                | 114.483(2),<br>109.348(2),<br>96.110(2)                                                                   | 90,<br>90,<br>120                                                                                                                   | 97.133(4),<br>102.510(4),<br>94.659(4)                                                                                |
| $V$ (Å <sup>3</sup> )                                                      | 4846.5(3)                                                                                                 | 3068.46(18)                                                                                                                         | 2303.93(19)                                                                                                           |
| $Z$                                                                        | 4                                                                                                         | 6                                                                                                                                   | 2                                                                                                                     |
| $\mu$ (mm <sup>-1</sup> )                                                  | 1.49                                                                                                      | 0.28                                                                                                                                | 4.62                                                                                                                  |
| Crystal size (mm)                                                          | 0.50 × 0.35 × 0.25                                                                                        | 0.50 × 0.25 × 0.25                                                                                                                  | 0.42 × 0.20 × 0.02                                                                                                    |
| $T_{\min}, T_{\max}$                                                       | 0.543, 0.718                                                                                              | 0.873, 0.964                                                                                                                        | 0.355, 0.924                                                                                                          |
| No. of measured, independent and observed [ $I > 2\sigma(I)$ ] reflections | 100356, 28253, 23541                                                                                      | 10175, 3833, 3630                                                                                                                   | 48246, 11109, 9248                                                                                                    |
| $R_{\text{int}}$                                                           | 0.037                                                                                                     | 0.035                                                                                                                               | 0.050                                                                                                                 |
| $(\sin \theta/\lambda)_{\text{max}}$ (Å <sup>-1</sup> )                    | 0.703                                                                                                     | 0.617                                                                                                                               | 0.661                                                                                                                 |
| $R[F^2 > 2\sigma(F^2)], wR(F^2), S$                                        | 0.034, 0.084, 1.03                                                                                        | 0.033, 0.081, 1.08                                                                                                                  | 0.033, 0.085, 1.07                                                                                                    |
| No. of reflections                                                         | 28253                                                                                                     | 3833                                                                                                                                | 11109                                                                                                                 |
| No. of parameters                                                          | 1299                                                                                                      | 244                                                                                                                                 | 514                                                                                                                   |
| No. of restraints                                                          | 239                                                                                                       | 1                                                                                                                                   | 0                                                                                                                     |
| $\Delta\rho_{\text{max}}, \Delta\rho_{\text{min}}$ (e Å <sup>-3</sup> )    | 0.74, -0.74                                                                                               | 0.24, -0.20                                                                                                                         | 1.27, -1.21                                                                                                           |
| Absolute structure                                                         | –                                                                                                         | $\chi$ (Flack) determined using 1573 quotients [(I+)-(I-)]/[(I+)+(I-)] (Parsons, Flack and Wagner, Acta Cryst. B69 (2013) 249-259). | –                                                                                                                     |
| Absolute structure parameter                                               | –                                                                                                         | -0.06 (5)                                                                                                                           | –                                                                                                                     |

- Additional NBO/NLMO representations

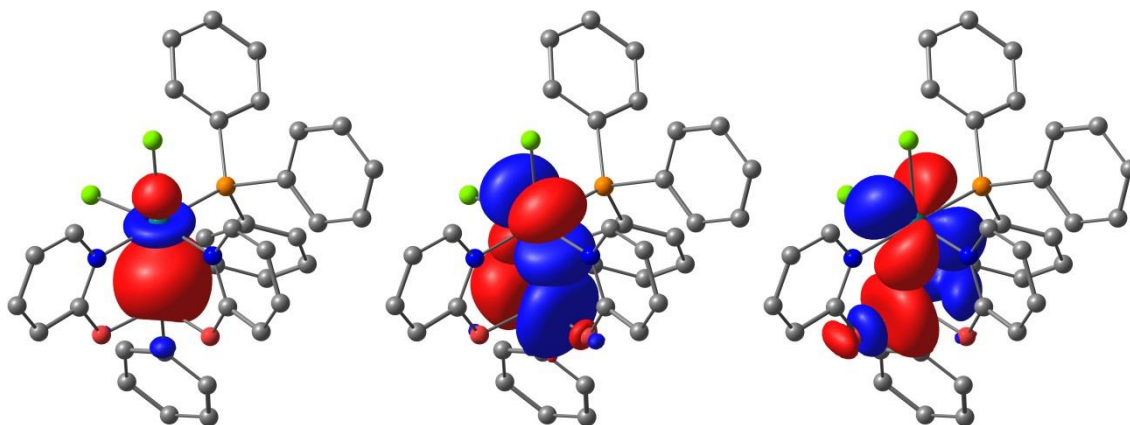

**Figure S26.** NLMO representation of  $\sigma$ -(As $\rightarrow$ Ru) bond in **3** (left) and NBO representations of  $\pi$ -(As $\leftarrow$ Ru) backbonding in **3** (middle, right) shown at an isosurface value of 0.06. H-atoms are omitted for clarity.

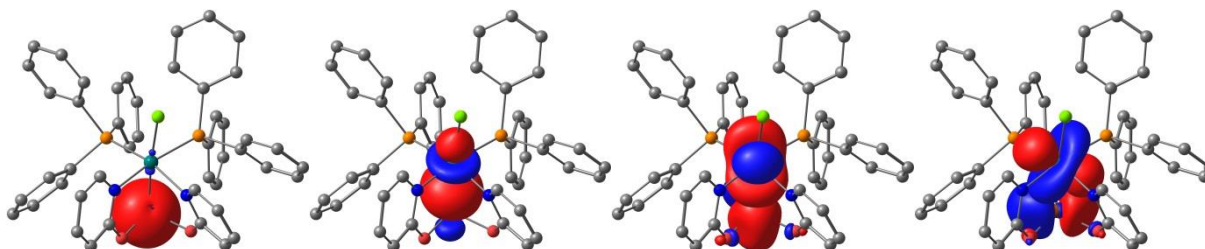

**Figure S27.** NLMO representation of As lone pair (left) and  $\sigma$ -(As $\rightarrow$ Ru) bond in **5** (middle left) and NBO representations of  $\pi$ -(As $\leftarrow$ Ru) backbonding in **5** (middle right, right) shown at an isosurface value of 0.06. H-atoms are omitted for clarity.

- Atomic coordinates of gas phase optimized molecular structures

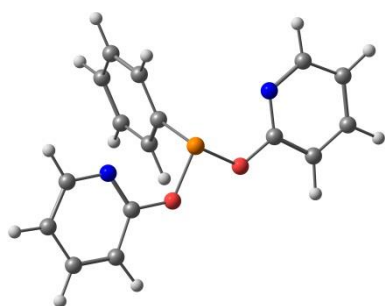

**Figure S28.** Optimized molecular structure of **P1<sup>I</sup>**.

Total energy at DFT-PBEPBE cc-pVTZ (for C H N O P) D3BJ level of theory:

-1213.49753598913 au.

Gibbs free energy: -1213.26245435 kcal mol<sup>-1</sup>

**Table S3.** Atomic coordinates of optimized structure of **P1<sup>I</sup>**.

|   |                   |                   |                   |
|---|-------------------|-------------------|-------------------|
| P | 2.61799291086423  | -0.83831663984043 | -4.92646840684194 |
| O | 3.53042119222041  | -0.77833998467142 | -3.54755922738452 |
| N | 4.26532987173569  | -2.87253758425551 | -3.93998153264738 |
| N | 1.07238066178568  | 0.73876205541125  | -6.64354955555102 |
| O | 2.18746087141838  | 0.74086010744699  | -4.68485576850466 |
| C | 4.93452228648384  | -1.25717206760829 | -8.21923475769610 |
| C | 3.94994657655036  | -1.41499445587449 | -7.26830493785496 |
| C | 3.92491836726977  | -0.60441233057822 | -6.15640919336792 |
| C | 4.89004133603910  | 0.36962896646650  | -5.99469461242462 |
| C | 5.87317234226246  | 0.52941964907317  | -6.94140188348369 |
| C | 5.89469876667633  | -0.28544940920050 | -8.05474708386461 |
| H | 4.95269427013567  | -1.88848297758659 | -9.08355198473383 |
| H | 3.19791854434796  | -2.16804130098517 | -7.38655249675821 |
| H | 4.86271096914008  | 0.99517049079670  | -5.12716260500205 |
| H | 6.62180489211938  | 1.28452583178494  | -6.81652388754313 |
| H | 6.66081618421439  | -0.16080664832680 | -8.79223335110466 |
| C | 0.95681403535873  | 2.64434955741097  | -5.23998026048581 |
| C | 0.14955573710355  | 3.26918289184408  | -6.14586232879782 |
| C | -0.20201581484030 | 2.61587555032910  | -7.31740056332123 |
| C | 0.28562275752393  | 1.35534151845004  | -7.51260294627568 |
| C | 1.39278855457811  | 1.36301602966044  | -5.54824556843150 |
| H | 1.25628543261702  | 3.10035586901355  | -4.32211813559474 |
| H | -0.20942327360831 | 4.25852348648522  | -5.94948036095682 |
| H | -0.83138732357646 | 3.07725788725954  | -8.04708242997657 |
| H | 0.04581625639111  | 0.80601476801648  | -8.40038920068522 |
| C | 4.22503207114955  | -1.83876902391987 | -3.15150617338100 |
| C | 4.87513507331090  | -1.78274362532009 | -1.92627643716636 |
| C | 5.59145785771902  | -2.87954391049200 | -1.54339652172694 |
| C | 5.64257869269885  | -3.98981859174473 | -2.37261208596865 |
| C | 4.96141902576066  | -3.93152038907167 | -3.55476674125156 |
| H | 4.80086633119067  | -0.90293142310513 | -1.32584545767270 |
| H | 6.10952264157794  | -2.87971535476757 | -0.60646516637860 |

|   |                  |                   |                   |
|---|------------------|-------------------|-------------------|
| H | 6.19478582784380 | -4.86370222348056 | -2.10278195371560 |
| H | 4.96796787393747 | -4.76074273861993 | -4.23283657344993 |

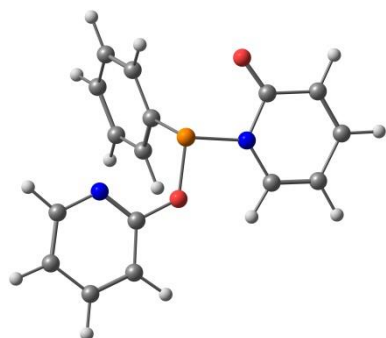

**Figure S29.** Optimized molecular structure of **P1<sup>H</sup>**.

Total energy at DFT-PBEPBE cc-pVTZ (for C H N O P) D3BJ level of theory:  
-1213.49182461239 au.

Gibbs free energy: -1213.25564167 kcal mol<sup>-1</sup>

**Table S4.** Atomic coordinates of optimized structure of **P1<sup>H</sup>**.

|   |                   |                  |                   |
|---|-------------------|------------------|-------------------|
| P | 2.55941897799513  | 1.57596655910030 | -4.02094451835511 |
| O | 2.49330190804220  | 2.60823155326803 | -2.72260415621269 |
| N | 4.17510221040441  | 1.47890629462574 | -1.73523367767447 |
| N | 1.30711216108210  | 2.47529241477957 | -4.88138913681195 |
| O | 1.74823004815135  | 0.99581036641137 | -6.46854582420129 |
| C | 5.84380516316569  | 1.90569762818210 | -6.35539564227142 |
| C | 4.72229004790026  | 1.43144909511350 | -5.71207831194929 |
| C | 4.01809606442027  | 2.25084090170668 | -4.85662980066685 |
| C | 4.44103393192270  | 3.54772119024973 | -4.64666877396436 |
| C | 5.56066432282855  | 4.02192712425374 | -5.28785483879110 |
| C | 6.26309039065489  | 3.19917462047279 | -6.14265132529290 |
| H | 6.38625447894779  | 1.26878626550861 | -7.02293854216759 |
| H | 4.37755221149832  | 0.43418962487736 | -5.88471424795948 |
| H | 3.89738954689618  | 4.18140433187422 | -3.97850782292525 |
| H | 5.88758411330395  | 5.02778108307534 | -5.12211939261783 |
| H | 7.13545764635865  | 3.56781270452398 | -6.64193148291439 |
| C | 0.02513074341961  | 2.54398795657242 | -6.89601520899055 |
| C | -0.63633446924353 | 3.60328196008552 | -6.42149671079464 |
| C | -0.33074324891144 | 4.14070553339167 | -5.14054320029701 |
| C | 0.62845843964889  | 3.55583228356388 | -4.42024950742594 |
| C | 1.06953137920028  | 1.92963824623169 | -6.12219646789966 |
| H | -0.17448628184940 | 2.11711272533151 | -7.85417867799042 |
| H | -1.40684328240817 | 4.05825259244735 | -7.01008377979678 |
| H | -0.85289212285545 | 4.98766938394275 | -4.75493654565958 |
| H | 0.90931992924962  | 3.89702189312418 | -3.45324840583216 |
| C | 3.26567946159707  | 2.40249584470646 | -1.65524929124736 |
| C | 3.06510154199822  | 3.19037802468534 | -0.53275067897529 |
| C | 3.87928160109544  | 2.96980221537093 | 0.54229915108935  |
| C | 4.85261782168910  | 1.98648194995877 | 0.47401182959994  |
| C | 4.95517751008662  | 1.27093353359438 | -0.68595847568744 |
| H | 2.29777713858847  | 3.93323821900900 | -0.52907994119477 |

|   |                  |                  |                   |
|---|------------------|------------------|-------------------|
| H | 3.76161341338704 | 3.55458052747034 | 1.43117625068864  |
| H | 5.50534610237475 | 1.78932217271200 | 1.29639132860537  |
| H | 5.69038092936046 | 0.49968956977878 | -0.79290040341575 |

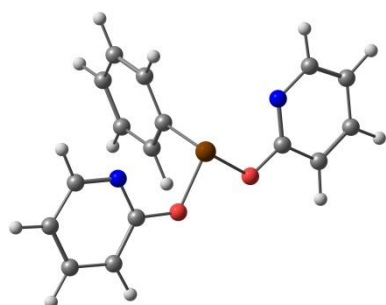

**Figure S30.** Optimized molecular structure of **1<sup>I</sup>**.

Total energy at DFT-PBEPBE cc-pVTZ (for C H N O) and SDD (for As) D3BJ level of theory: -878.73251089777 au.

Gibbs free energy: -878.49947445 kcal mol<sup>-1</sup>

**Table S5.** Atomic coordinates of optimized structure of **1<sup>I</sup>**.

|    |                   |                   |                   |
|----|-------------------|-------------------|-------------------|
| C  | 4.96038601995928  | -1.17994436276758 | -8.16199148598400 |
| C  | 3.95293530449838  | -1.39070094911661 | -7.24671587232110 |
| C  | 3.87260388538639  | -0.61556798602207 | -6.11349421474904 |
| C  | 4.80314575985031  | 0.37631416893417  | -5.89169519227111 |
| C  | 5.81070509723073  | 0.59014150416839  | -6.80303013526076 |
| C  | 5.88878590389059  | -0.18867050644112 | -7.93844273838231 |
| H  | 5.02180904742581  | -1.78401022475680 | -9.04367150563810 |
| H  | 3.22835775180642  | -2.16151432926231 | -7.41742860173359 |
| H  | 4.72977198725102  | 0.97219313522016  | -5.00673640964980 |
| H  | 6.53448637485038  | 1.36038414349865  | -6.63218999870725 |
| H  | 6.67346810759195  | -0.02158678203348 | -8.64740500087589 |
| C  | 0.94846655194510  | 2.72336422600186  | -5.32416884160855 |
| C  | 0.20437332963265  | 3.29456317300254  | -6.31431681527929 |
| C  | -0.14647154059554 | 2.55081542510830  | -7.43258779947266 |
| C  | 0.27858685935031  | 1.25506681285950  | -7.48952072040737 |
| C  | 1.32946942012666  | 1.39582563434847  | -5.48827279558457 |
| H  | 1.24281413420727  | 3.25360955450482  | -4.44537435685515 |
| H  | -0.10725421955619 | 4.31525314723131  | -6.22649494096964 |
| H  | -0.72702234270298 | 2.97130115827570  | -8.22459264261946 |
| H  | 0.03736460452893  | 0.63548903413982  | -8.32962189228694 |
| C  | 4.20738315454710  | -1.84587596420090 | -3.06737835980407 |
| C  | 4.99421928878639  | -1.83420446629613 | -1.92055588183103 |
| C  | 5.74212216866924  | -2.94362439362481 | -1.65566746043441 |
| C  | 5.69638890354586  | -4.03069151653065 | -2.51763505596803 |
| C  | 4.88748031210098  | -3.93610580705499 | -3.61289669484617 |
| H  | 4.99516186489799  | -0.97382219275840 | -1.28824177431644 |
| H  | 6.36260504744244  | -2.97320606078368 | -0.78345391041116 |
| H  | 6.27185530940740  | -4.91240178061664 | -2.33723588625844 |
| H  | 4.81437070926102  | -4.74486047640869 | -4.31175768680164 |
| As | 2.45306230485126  | -0.93315333072390 | -4.85113202044792 |
| O  | 3.47366085639224  | -0.79765447530469 | -3.37203331421893 |

|   |                  |                   |                   |
|---|------------------|-------------------|-------------------|
| N | 4.15729767290728 | -2.86511342655719 | -3.88405448194512 |
| N | 1.00297188682167 | 0.68762878434395  | -6.53715419827485 |
| O | 2.05429028369161 | 0.80100310962299  | -4.56593150378521 |

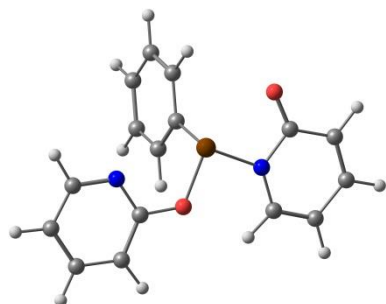

**Figure S31.** Optimized molecular structure of **1<sup>H</sup>**.

Total energy at DFT-PBEPBE cc-pVTZ (for C H N O) and SDD (for As) D3BJ level of theory: -878.732627032363 au.

Gibbs free energy: -878.49862734 kcal mol<sup>-1</sup>

**Table S6.** Atomic coordinates of optimized structure of **1<sup>H</sup>**.

|    |                   |                  |                   |
|----|-------------------|------------------|-------------------|
| C  | 5.84188577944534  | 1.95516385505162 | -6.37608931660693 |
| C  | 4.72650726489254  | 1.44187364424177 | -5.75243324401599 |
| C  | 4.03131375163838  | 2.20367270490639 | -4.83967094043820 |
| C  | 4.45622116336455  | 3.48218159252890 | -4.55004133674064 |
| C  | 5.56837122830506  | 3.99774747868316 | -5.17367255429807 |
| C  | 6.26281485859931  | 3.23293446720100 | -6.08601585337531 |
| H  | 6.37687137349102  | 1.36215891111608 | -7.08873737726182 |
| H  | 4.38347652309984  | 0.45743655197102 | -5.99147792455875 |
| H  | 3.91828358498989  | 4.07128680822438 | -3.83914164981321 |
| H  | 5.89553690041987  | 4.99202217190684 | -4.94862116823987 |
| H  | 7.12903664673113  | 3.63428977675321 | -6.57051519796980 |
| C  | 0.04016125241021  | 2.52996696373988 | -6.96285075215665 |
| C  | -0.62907132264135 | 3.60568340844481 | -6.52311285753610 |
| C  | -0.39233138578974 | 4.14345634135190 | -5.23206823255690 |
| C  | 0.52062859688195  | 3.54328844108865 | -4.45754387078523 |
| C  | 1.01752421064444  | 1.91098800647974 | -6.12098626335514 |
| H  | -0.11595455057761 | 2.10713099999311 | -7.93080686237142 |
| H  | -1.35647045809880 | 4.07164136347956 | -7.15653036338202 |
| H  | -0.92283340207720 | 5.00044896115524 | -4.88185355021862 |
| H  | 0.76256280278710  | 3.87809945280032 | -3.47595122818456 |
| C  | 3.22113386781341  | 2.43353511935318 | -1.59836066991512 |
| C  | 3.15181784015111  | 3.26745273983137 | -0.48947293938160 |
| C  | 4.02697137282298  | 3.03431005184116 | 0.53251265680146  |
| C  | 4.93729864804601  | 1.99287126902314 | 0.43705784637862  |
| C  | 4.91525541110750  | 1.23352158550171 | -0.69831763471100 |
| H  | 2.43229245526430  | 4.05614889408600 | -0.45948687021478 |
| H  | 4.00724214555445  | 3.65554978372124 | 1.40434567418912  |
| H  | 5.63478756161849  | 1.78648097841368 | 1.21929789631973  |
| H  | 5.59614634360863  | 0.41657009235259 | -0.82583955353227 |
| As | 2.49488024169608  | 1.41962226269905 | -3.97511597404801 |
| O  | 2.40709663339213  | 2.62466075152535 | -2.61887188160378 |

|   |                  |                  |                   |
|---|------------------|------------------|-------------------|
| N | 4.07482431200854 | 1.45120666341710 | -1.69738785855102 |
| N | 1.19704790760753 | 2.46058221071894 | -4.88685935553590 |
| O | 1.70917027079291 | 0.94743208639792 | -6.39059702233025 |

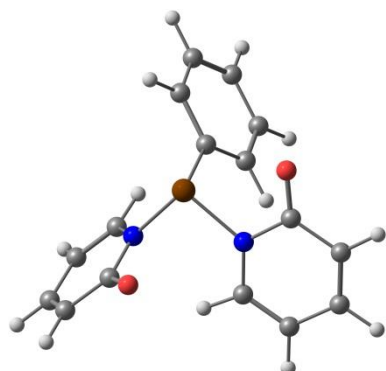

**Figure S32.** Optimized molecular structure of **1<sup>III</sup>**.

Total energy at DFT-PBEPBE cc-pVTZ (for C H N O) and SDD (for As) D3BJ level of theory: -878.727182408373 au.

**Table S7.** Atomic coordinates of optimized structure of **1<sup>III</sup>**.

|    |                   |                   |                   |
|----|-------------------|-------------------|-------------------|
| C  | -2.45273966923720 | 4.81511220243795  | 0.02849588159679  |
| C  | -1.44636738444658 | 3.96003641680170  | -0.16619317495542 |
| C  | -0.60794698920200 | 5.18676840127590  | -2.03723485212456 |
| C  | -1.70148640806303 | 6.10229660471698  | -1.85302200122500 |
| C  | -2.57595809069071 | 5.91993484671296  | -0.85852474778608 |
| H  | -3.14433114078875 | 4.66301163786845  | 0.82661335232681  |
| H  | -1.29670828838158 | 3.10721200661391  | 0.45393660375889  |
| H  | -1.76234160525490 | 6.92155572762374  | -2.53515896315437 |
| H  | -3.38124176652387 | 6.61309035474116  | -0.72331830188046 |
| C  | -0.50719348969916 | -0.27838019429453 | 0.65409202645743  |
| C  | 0.00834072687674  | -0.03182777636735 | 1.90471816655352  |
| C  | 0.79115034910228  | 1.08374129590208  | 2.11988916416769  |
| C  | 1.05056563758777  | 1.95362112202837  | 1.08801814783573  |
| C  | 0.52723841188551  | 1.71824731417647  | -0.16622535125346 |
| C  | -0.24030998580246 | 0.59449514277997  | -0.37919858940991 |
| H  | -1.10669515912860 | -1.14785139738901 | 0.48095312874704  |
| H  | -0.19125701613641 | -0.70846485995130 | 2.70956771644176  |
| H  | 1.19994181354235  | 1.27031303079760  | 3.09141160179210  |
| H  | 1.65698146744022  | 2.81638811836508  | 1.26024809885237  |
| H  | -0.63481446101751 | 0.39597576615198  | -1.35626424651343 |
| C  | 3.35811820065913  | 3.16132544640453  | -1.03005678678067 |
| C  | 4.54187353208142  | 3.78797259658883  | -0.51849114433392 |
| C  | 4.46778449226602  | 5.00647793942085  | 0.03170300017488  |
| C  | 3.23172185490020  | 5.70229619135686  | 0.11652449345317  |
| C  | 2.14052767911967  | 5.10944978821257  | -0.37678838183960 |
| H  | 5.45570616866623  | 3.24124457436309  | -0.59563196014457 |
| H  | 5.35382314880707  | 5.46948808434641  | 0.41608843848709  |
| H  | 3.17117649866787  | 6.67660029701270  | 0.54677774833802  |
| H  | 1.18147775409960  | 5.56921162813445  | -0.35521572350759 |
| As | 0.79877623216131  | 2.88322896836902  | -1.68637391081807 |
| O  | 3.27871871030773  | 2.05971394981224  | -1.52646863232891 |

|   |                   |                  |                   |
|---|-------------------|------------------|-------------------|
| N | 2.19780235951356  | 3.87847682393264 | -0.92526685861773 |
| N | -0.54662062855264 | 4.12359606246981 | -1.16763826367293 |
| O | 0.26175180524074  | 5.29403739858389 | -2.86621960863661 |

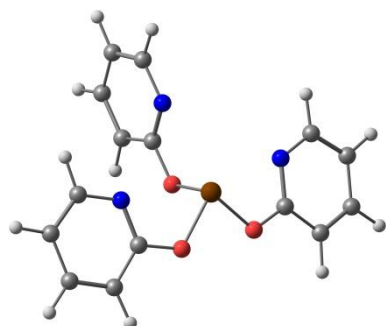

**Figure S33.** Optimized molecular structure of **2<sup>I</sup>**.

Total energy at DFT-PBEPBE cc-pVTZ (for C H N O) and SDD (for As) D3BJ level of theory: -969.649991768985au.

**Table S8.** Atomic coordinates of optimized structure of **2<sup>I</sup>**.

|   |                   |                   |                   |
|---|-------------------|-------------------|-------------------|
| N | 8.07417620375816  | 1.74481977477825  | 12.36390354761620 |
| N | 10.92415255401970 | 5.01657239642641  | 9.17576391667346  |
| N | 8.58820618979280  | 2.27632580427564  | 8.83746478403818  |
| O | 9.86499531367208  | 3.01627654446810  | 12.78588902948437 |
| O | 11.16104360953122 | 4.49360474985890  | 11.33744380681811 |
| O | 10.26440583342787 | 2.29503734426864  | 10.34808393126537 |
| C | 9.01652469401744  | 2.09449007157153  | 13.19844217606115 |
| C | 9.14741528678446  | 1.54435828579747  | 14.46713818255505 |
| H | 9.93877049779150  | 1.86806584016085  | 15.10649977402212 |
| C | 8.23961783793194  | 0.59509251694117  | 14.83867568025851 |
| H | 8.30590175781449  | 0.14410652242362  | 15.80756788776920 |
| C | 7.23410927081567  | 0.21752938317486  | 13.96059316515347 |
| H | 6.51089390856304  | -0.52316309112216 | 14.22400226951187 |
| C | 7.19873503166101  | 0.82582599540660  | 12.73819104592812 |
| H | 6.44603458531716  | 0.57353683509748  | 12.01899460266942 |
| C | 11.64096450419223 | 5.09376362820932  | 10.26530501658012 |
| C | 12.85371201818055 | 5.76775339204557  | 10.32806895951214 |
| H | 13.39748552073259 | 5.79787877855846  | 11.24631732151325 |
| C | 13.30079418961900 | 6.36751444566561  | 9.18614052063899  |
| H | 14.23231102732049 | 6.89552525995143  | 9.19082831187848  |
| C | 12.54774360886886 | 6.29110494014653  | 8.02361611055274  |
| H | 12.87357688461235 | 6.74931516166524  | 7.11536894994608  |
| C | 11.36809036084155 | 5.60453077154637  | 8.07666086001871  |
| H | 10.74537378051995 | 5.51196668054251  | 7.20997446112947  |
| C | 9.69097069614665  | 1.74863774030371  | 9.28905259503218  |
| C | 10.29351276711955 | 0.63897324758795  | 8.70984339179409  |
| H | 11.19749530874131 | 0.25210731194250  | 9.12585530989117  |
| C | 9.69051373457461  | 0.08608966820221  | 7.61729616255596  |
| H | 10.12457641886470 | -0.77020043625911 | 7.14304317437092  |
| C | 8.51712780378415  | 0.63858595823063  | 7.12817076362097  |
| H | 8.01880356376413  | 0.23142356230049  | 6.27530147994051  |
| C | 8.01417911225299  | 1.73046212842030  | 7.77776880731275  |
| H | 7.10988249455667  | 2.19715551311775  | 7.44191434446636  |



As 9.57163563040913 3.70012127429519 11.16298765942044

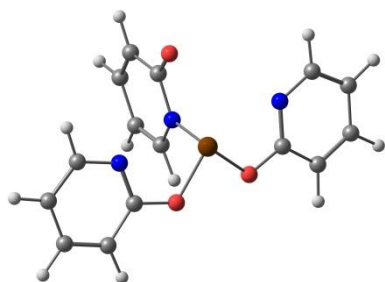

**Figure S34.** Optimized molecular structure of **2<sup>II</sup>**.

Total energy at DFT-PBEPBE cc-pVTZ (for C H N O) and SDD (for As) D3BJ level of theory: -969.650697007676 au.

**Table S9.** Atomic coordinates of optimized structure of **2<sup>II</sup>**.

|    |                   |                   |                   |
|----|-------------------|-------------------|-------------------|
| N  | 6.98905511960453  | 4.34323081864293  | 9.58034781733799  |
| N  | 11.78151449548090 | 2.80691517795832  | 11.39066967179243 |
| N  | 9.18937415343058  | 2.23095161105775  | 9.85813410307403  |
| O  | 7.60414717771286  | 3.52039472692319  | 11.56182138359209 |
| O  | 9.78259524153025  | 2.81950070271306  | 12.38352277253049 |
| O  | 10.17890357151473 | 3.43708298618444  | 8.27179194944255  |
| C  | 6.63004379166509  | 3.91188392967665  | 10.75915446783481 |
| C  | 5.30733070194860  | 3.84848758108171  | 11.17388264874649 |
| H  | 5.07080967141649  | 3.48820230449292  | 12.15075517628613 |
| C  | 4.35219214167143  | 4.26105632683535  | 10.28837737390562 |
| H  | 3.31860504874296  | 4.22818135700830  | 10.56600835546433 |
| C  | 4.72276804173880  | 4.72163804459461  | 9.03398620422794  |
| H  | 3.99651612955978  | 5.04930756482452  | 8.32252244332341  |
| C  | 6.05551807517680  | 4.74327185183947  | 8.73260929648042  |
| H  | 6.40234258014864  | 5.08822806791813  | 7.77995222512287  |
| C  | 11.06164899918333 | 2.49113892965658  | 12.43309613913248 |
| C  | 11.57928840071240 | 1.84116951146494  | 13.54452600727149 |
| H  | 10.94433951826286 | 1.60880502476071  | 14.37088921568245 |
| C  | 12.90813291462665 | 1.52454274288701  | 13.52325758070600 |
| H  | 13.34935122602073 | 1.02145349510139  | 14.35913415306785 |
| C  | 13.68190484836825 | 1.85578103887477  | 12.42118099136962 |
| H  | 14.72269829805442 | 1.61933691491306  | 12.37832754753891 |
| C  | 13.06802219738914 | 2.49841500930334  | 11.38310493743697 |
| H  | 13.61361510119898 | 2.77959354539174  | 10.50554937388958 |
| C  | 9.71347376920013  | 2.37787276571614  | 8.59741457999023  |
| C  | 9.65017962412587  | 1.20344867560703  | 7.76045575831959  |
| H  | 10.05249362685059 | 1.29717450396191  | 6.77567644805654  |
| C  | 9.11210606840713  | 0.07067538090744  | 8.21601730683934  |
| H  | 9.07262494834766  | -0.79221319541342 | 7.58244424866994  |
| C  | 8.58459078184390  | -0.01526514172100 | 9.53934770804952  |
| H  | 8.15374224033925  | -0.91935613495418 | 9.90761749292399  |
| C  | 8.64568455938777  | 1.07132454717316  | 10.30659046632091 |
| H  | 8.27826344431848  | 1.10397917941477  | 11.30758972662017 |
| As | 9.27265656202007  | 3.74221913520326  | 10.92598209895283 |

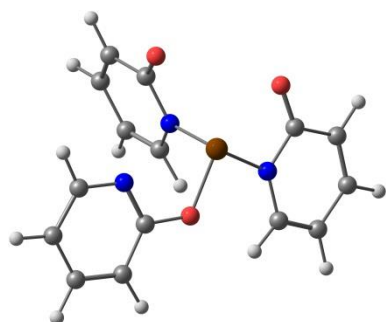

**Figure S35.** Optimized molecular structure of  $2^{III}$ .

Total energy at DFT-PBEPBE cc-pVTZ (for C H N O) and SDD (for As) D3BJ level of theory: -969.645030251708 au.

**Table S10.** Atomic coordinates of optimized structure of  $2^{III}$ .

|    |                   |                  |                   |
|----|-------------------|------------------|-------------------|
| N  | 9.04330552852556  | 5.91349170042813 | 9.06525809755889  |
| N  | 10.86638995358709 | 3.08607527414214 | 11.82723225408266 |
| N  | 8.40902025326606  | 4.25388416489764 | 11.55556674203067 |
| O  | 10.63791040133035 | 5.22357573474282 | 10.46469872658418 |
| O  | 9.38244121635748  | 1.47281927745404 | 11.76599579583571 |
| O  | 6.96899256178691  | 3.37998100794445 | 10.10194738368379 |
| C  | 10.14749947337916 | 6.18878407617505 | 9.70217445182262  |
| C  | 10.79048061334618 | 7.41410639979819 | 9.61266148800188  |
| H  | 11.69391331892400 | 7.58823389810661 | 10.15486396439338 |
| C  | 10.21966834610017 | 8.36447681512028 | 8.81230664979086  |
| H  | 10.68138747490862 | 9.32548108817205 | 8.71427017908533  |
| C  | 9.04672454028695  | 8.08179415587596 | 8.13078172831105  |
| H  | 8.57938202788762  | 8.80619033554928 | 7.50010388297380  |
| C  | 8.50075569493054  | 6.83847669817923 | 8.29156695351696  |
| H  | 7.59528360954261  | 6.56087106103404 | 7.79194441082905  |
| C  | 10.39630430343062 | 1.88640484954150 | 12.28452052667958 |
| C  | 11.15095580352206 | 1.25571789895611 | 13.32803772821996 |
| H  | 10.79247120253276 | 0.31976335131366 | 13.69606563634285 |
| C  | 12.25486943388505 | 1.84815937847745 | 13.79975453259263 |
| H  | 12.81658992207229 | 1.37725847413290 | 14.58069329193571 |
| C  | 12.70161516070579 | 3.09576801019833 | 13.28302553806864 |
| H  | 13.58450500354177 | 3.56480899748520 | 13.65582313568878 |
| C  | 11.98788464192723 | 3.66805249834754 | 12.30893873054602 |
| H  | 12.24952848602764 | 4.60028657892378 | 11.86585621082950 |
| C  | 7.13041004743021  | 3.96238128602432 | 11.13805250527944 |
| C  | 6.07430731389259  | 4.41156214537563 | 12.01554643954473 |
| H  | 5.07627699601375  | 4.18100328684945 | 11.71386609216425 |
| C  | 6.35492469897093  | 5.07755325110432 | 13.13549730552018 |
| H  | 5.56044587953875  | 5.40538505083056 | 13.77464780340511 |
| C  | 7.70543881488442  | 5.36501087284740 | 13.50198006593817 |
| H  | 7.93613793850888  | 5.90217753785655 | 14.39464725908197 |
| C  | 8.67480225396420  | 4.93907250437685 | 12.69670729913389 |
| H  | 9.70740368903251  | 5.11408606927744 | 12.89668663081248 |
| As | 9.73381759595919  | 3.64832228046105 | 10.41664064971527 |

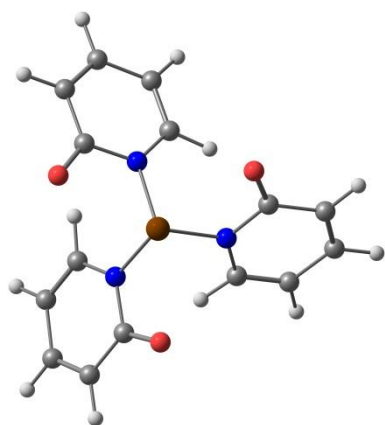

**Figure S36.** Optimized molecular structure of  $2^{IV}$ .

Total energy at DFT-PBEPBE cc-pVTZ (for C H N O) and SDD (for As) D3BJ level of theory: -969.645485209008 au.

**Table S11.** Atomic coordinates of optimized structure of  $2^{IV}$ .

|    |                   |                   |                   |
|----|-------------------|-------------------|-------------------|
| N  | 0.14387157402032  | -1.58135617730681 | -0.03436492967953 |
| N  | -1.43819203560498 | 0.65988128567051  | -0.01865967802792 |
| N  | 1.29393217631790  | 0.90954618356137  | -0.03233744823282 |
| O  | -1.58480950696787 | -2.10699637995250 | -1.29177474708915 |
| O  | -1.04239357841376 | 2.42034848704520  | -1.27946184059967 |
| O  | 2.60732968500110  | -0.31283075425212 | -1.30772516650589 |
| C  | -0.77195037186649 | -2.49607904223605 | -0.48316180861420 |
| C  | -0.69374027575356 | -3.81173994542807 | 0.08104812840482  |
| H  | -1.39635816376922 | -4.53512732418439 | -0.26951623084271 |
| C  | 0.22759474982784  | -4.08446658736770 | 1.01312649112733  |
| H  | 0.27830956902457  | -5.06638331081950 | 1.43765951295014  |
| C  | 1.14584690393632  | -3.09211192230741 | 1.45288612880438  |
| H  | 1.88445050651950  | -3.30836291363878 | 2.19156852000888  |
| C  | 1.07482267031871  | -1.87909744619117 | 0.90058690748590  |
| H  | 1.73507842880846  | -1.09029447165042 | 1.17181407085223  |
| C  | -1.77723973806736 | 1.91057726330739  | -0.46327150122544 |
| C  | -2.94977230601471 | 2.50026507293932  | 0.11357708302211  |
| H  | -3.22853107730043 | 3.47074240106249  | -0.23329612133295 |
| C  | -3.63702620781952 | 1.83789110711603  | 1.05219857745126  |
| H  | -4.50833125128549 | 2.28457576158665  | 1.48609045448848  |
| C  | -3.23230613993464 | 0.54612209304758  | 1.48673287180325  |
| H  | -3.78138167684864 | 0.01392568996169  | 2.23053002011815  |
| C  | -2.15191426644445 | 0.00163293742007  | 0.92299259293903  |
| H  | -1.79610256809625 | -0.96479116562472 | 1.18975735149326  |
| C  | 2.54184962523339  | 0.57768493744134  | -0.49002738022010 |
| C  | 3.64494901301268  | 1.29718134901763  | 0.07648693182018  |
| H  | 4.62106641129081  | 1.05340365759728  | -0.28076060252782 |
| C  | 3.42503235342145  | 2.22228337034173  | 1.01873111179451  |
| H  | 4.25217759315165  | 2.75252766628354  | 1.44491316128160  |
| C  | 2.10858893529784  | 2.51766308099059  | 1.46715631369902  |
| H  | 1.93016781940045  | 3.25833482428045  | 2.21382892453083  |
| C  | 1.09085552498333  | 1.85558192541659  | 0.91275757308718  |
| H  | 0.07884438785775  | 2.03089136225602  | 1.18997101071539  |
| As | -0.00547076323669 | -0.00053101538386 | -1.05600528297971 |

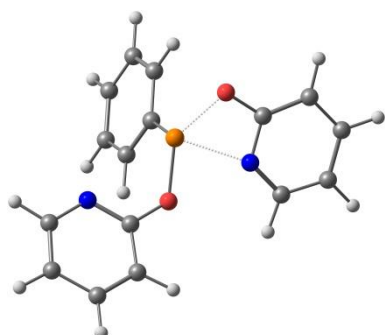

**Figure S37.** Transition state TS2 molecular structure of PhP(PyO)<sub>2</sub>.

Total energy at DFT-PBEPBE cc-pVTZ (for C H N O P) D3BJ level of theory:

-1213.43766429196 au.

Gibbs free energy: -1213.2017545 kcal mol<sup>-1</sup>

**Table S12.** Atomic coordinates of transition state structure of PhP(PyO)<sub>2</sub>.

|   |                   |                   |                   |
|---|-------------------|-------------------|-------------------|
| P | -0.42036380152162 | -0.88593950818298 | -0.49697089671028 |
| O | -0.50578372039323 | 0.08013035515396  | 0.90725925448934  |
| N | 1.08846964376506  | -1.17896876523905 | 1.89991280345840  |
| N | -2.32136245647907 | -0.11364472999366 | -0.68015979879053 |
| O | -0.95228267171409 | -0.43915951508817 | -2.22267669174855 |
| C | 3.23872315364954  | -0.56240331450284 | -2.19918776737207 |
| C | 2.00099604096898  | -0.99733121323935 | -1.78637884599950 |
| C | 1.20665693320694  | -0.19923043208328 | -0.98802519003644 |
| C | 1.66463460581418  | 1.04501159627014  | -0.61543906144514 |
| C | 2.90004436171772  | 1.48708041154961  | -1.03446045586337 |
| C | 3.69093459728459  | 0.68389960691307  | -1.82383156100721 |
| H | 3.85077278144032  | -1.19315462825857 | -2.81083950540062 |
| H | 1.64798044835983  | -1.96545511849216 | -2.07980178025431 |
| H | 1.05996849031511  | 1.66817479582373  | 0.00680670270379  |
| H | 3.24637171862059  | 2.45683480381994  | -0.74043722659200 |
| H | 4.65418772435566  | 1.02478219911510  | -2.14333546859835 |
| C | -3.22544776761770 | 0.12864874092472  | -2.84573439058434 |
| C | -4.42050150001357 | 0.42011731225647  | -2.25868784826900 |
| C | -4.56853806792211 | 0.43991172834409  | -0.86901494364793 |
| C | -3.47852838179416 | 0.15902377204016  | -0.10564408110911 |
| C | -2.17023144935151 | -0.13663491465146 | -1.97928443817312 |
| H | -3.08811256001385 | 0.10261131297605  | -3.90352861745036 |
| H | -5.26802295033665 | 0.63773236438631  | -2.87609018569251 |
| H | -5.50746415148152 | 0.67296311107314  | -0.41777345004463 |
| H | -3.49891141150012 | 0.15406459987574  | 0.96370118605457  |
| C | 0.33281049529476  | -0.11882814682698 | 1.91401400911148  |
| C | 0.35755184237545  | 0.81685334153643  | 2.94168354552168  |
| C | 1.22196431993414  | 0.60300213824362  | 3.97633646923010  |
| C | 2.03445037407842  | -0.51969612755825 | 3.96872104847131  |
| C | 1.92454517217582  | -1.37292215770449 | 2.90686318206123  |
| H | -0.28482877908921 | 1.66920683103543  | 2.89708505946576  |
| H | 1.27185356454029  | 1.30234231810467  | 4.78573519430450  |
| H | 2.72524963259240  | -0.71635528121566 | 4.75970507102652  |
| H | 2.53001526873853  | -2.25506769640551 | 2.84981519889073  |

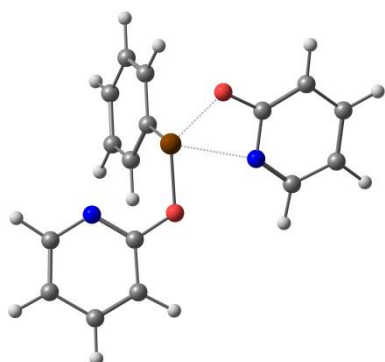

**Figure S38.** Transition state TS1 molecular structure of PhAs(PyO)<sub>2</sub>.

Total energy at DFT-PBEPBE cc-pVTZ (for C H N O) and SDD (for As) D3BJ level of theory: -878.691966775811 au.

Gibbs free energy: -878.45873675 kcal mol<sup>-1</sup>

**Table S13.** Atomic coordinates of transition state structure of PhAs(PyO)<sub>2</sub>.

|    |                   |                  |                   |
|----|-------------------|------------------|-------------------|
| As | 2.76612201053320  | 1.24613344554403 | -3.82721928518560 |
| O  | 2.62446158311834  | 2.58661782296214 | -2.54572143573027 |
| N  | 4.36823071544493  | 1.56751853033633 | -1.57898948464059 |
| N  | 1.10371565328930  | 2.87628346476877 | -4.66458095809418 |
| O  | 1.69473766897406  | 0.93730715428944 | -5.40553851829698 |
| C  | 5.43431255905754  | 2.22483925302505 | -6.85561909518332 |
| C  | 4.43569166270139  | 1.64529039770198 | -6.10628720507212 |
| C  | 4.09808650491190  | 2.16458831676439 | -4.87194583949456 |
| C  | 4.77558185363422  | 3.26479546247171 | -4.39002784734067 |
| C  | 5.76811292950331  | 3.84930902621395 | -5.14183211632509 |
| C  | 6.09953360866117  | 3.32933972498533 | -6.37382255321667 |
| H  | 5.68846137121085  | 1.81905137560261 | -7.81301520436888 |
| H  | 3.90505948266091  | 0.79950171643180 | -6.48721850034873 |
| H  | 4.51908484277468  | 3.66770758345114 | -3.43740257060538 |
| H  | 6.28365282477893  | 4.70955296804314 | -4.76730401880045 |
| H  | 6.87357437901758  | 3.78493911746040 | -6.95650456385471 |
| C  | 0.14575682919060  | 2.19919800613544 | -6.71815671155825 |
| C  | -0.52901472054284 | 3.38569408027599 | -6.76664421905278 |
| C  | -0.38331661448365 | 4.32831195521861 | -5.75468664889456 |
| C  | 0.45215742802127  | 4.02219302425904 | -4.71865860296553 |
| C  | 0.97359331044159  | 1.98962397482262 | -5.61982413212590 |
| H  | 0.05997999705831  | 1.45651534462727 | -7.48025980865841 |
| H  | -1.17522940824729 | 3.59224183003191 | -7.59542406378879 |
| H  | -0.90470107637980 | 5.25990577351716 | -5.78219620291861 |
| H  | 0.61424025533761  | 4.69882492947990 | -3.90458111937782 |
| C  | 3.35248590519650  | 2.38755168329415 | -1.47213209496915 |
| C  | 3.04268438259254  | 3.04668780949393 | -0.28406024221827 |
| C  | 3.84339872472077  | 2.82317495993553 | 0.79658384379815  |
| C  | 4.91871746742441  | 1.95114392269056 | 0.69095394150408  |
| C  | 5.12833871680487  | 1.34973273098194 | -0.51605453012761 |
| H  | 2.19923219176029  | 3.70086952909722 | -0.24896903139103 |
| H  | 3.63845384274453  | 3.31638251122455 | 1.72483256413883  |
| H  | 5.56288072608884  | 1.75398032083837 | 1.52008014602814  |
| H  | 5.94242239199914  | 0.66660825402359 | -0.65299189086430 |

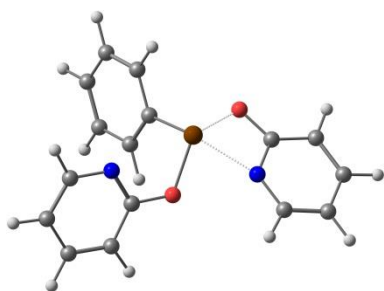

**Figure S39.** Transition state TS2 molecular structure of PhAs(PyO)<sub>2</sub>.

Total energy at DFT-PBEPBE cc-pVTZ (for C H N O) and SDD (for As) D3BJ level of theory: -878.694712972797 au.

Gibbs free energy: -878.461278 kcal mol<sup>-1</sup>

**Table S14.** Atomic coordinates of transition state structure of PhAs(PyO)<sub>2</sub>.

|    |                   |                   |                   |
|----|-------------------|-------------------|-------------------|
| As | -0.40783083181757 | -1.07004308012623 | -0.41592973254620 |
| O  | -0.53526294133198 | 0.08902470374752  | 1.01472770314567  |
| N  | 1.05742524198010  | -1.17986473659029 | 1.95188883017637  |
| N  | -2.42901306367904 | -0.17987589443119 | -0.66625791456593 |
| O  | -1.03429091618564 | -0.57763084287523 | -2.22403871594964 |
| C  | 3.30615473447841  | -0.53378896386404 | -2.19398737217917 |
| C  | 2.09762087958378  | -1.02723696061035 | -1.75671368205672 |
| C  | 1.26459123603130  | -0.25389176285399 | -0.97807174507955 |
| C  | 1.64875645932500  | 1.02446121078929  | -0.64139396377244 |
| C  | 2.85282613739958  | 1.52480363709289  | -1.08240973052918 |
| C  | 3.68468780406978  | 0.74600982099792  | -1.85627248672502 |
| H  | 3.94956354540037  | -1.14388240167486 | -2.79419808502690 |
| H  | 1.80391933495506  | -2.02311298522968 | -2.02527745616057 |
| H  | 1.00838785174554  | 1.62618824832584  | -0.03427224489474 |
| H  | 3.14492904029248  | 2.52105588345825  | -0.81988131525681 |
| H  | 4.62334617976598  | 1.13478315925646  | -2.19376573107830 |
| C  | -3.24718420306035 | 0.11488838186519  | -2.86276282596638 |
| C  | -4.44387188140646 | 0.48288037107334  | -2.32682018195415 |
| C  | -4.63829499959758 | 0.51966348854034  | -0.94439071184161 |
| C  | -3.59148435708947 | 0.17444037274107  | -0.14722784385145 |
| C  | -2.23245558597726 | -0.21343076289570 | -1.96419050869848 |
| H  | -3.07107638039500 | 0.07793225965337  | -3.91475670498586 |
| H  | -5.25163350318492 | 0.74946511425827  | -2.97765829932976 |
| H  | -5.57446400100367 | 0.81370151166973  | -0.52376873816132 |
| H  | -3.65553618049152 | 0.18111627036039  | 0.92099838732016  |
| C  | 0.31851795871819  | -0.10176081627989 | 1.99505313264775  |
| C  | 0.40873956550480  | 0.82953813976506  | 3.02558688442077  |
| C  | 1.31219804024561  | 0.59320005653719  | 4.02028813075889  |
| C  | 2.10283971546651  | -0.54591991825900 | 3.97802346158937  |
| C  | 1.93229364441457  | -1.39397166487887 | 2.92104121937203  |
| H  | -0.21739164728126 | 1.69482217953659  | 3.01197763068075  |
| H  | 1.41088250448291  | 1.28866578951707  | 4.82870193181955  |
| H  | 2.82192229940863  | -0.75730132344639 | 4.73924487714433  |
| H  | 2.51798981923308  | -2.28732869517006 | 2.83685032153455  |

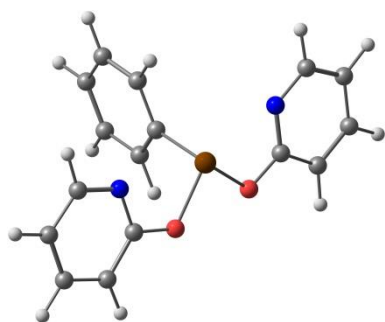

**Figure S40.** Optimized molecular structure of **1<sup>I</sup>**.

Total energy at DFT-B3LYP cc-pVTZ (for C H N O) and SDD (for As) D3BJ level of theory:  
-884.072801288045 au.

Gibbs free energy: -883.85994507 kcal mol<sup>-1</sup>

**Table S15.** Atomic coordinates of optimized structure of **1<sup>I</sup>**.

|    |                   |                   |                   |
|----|-------------------|-------------------|-------------------|
| C  | 4.96801126036032  | -1.14943531183142 | -8.15568458222212 |
| C  | 3.96715025315196  | -1.34313074607965 | -7.21196526534522 |
| C  | 3.91189982524558  | -0.54575185863591 | -6.07459959910076 |
| C  | 4.86326799321141  | 0.44994875301045  | -5.88119449432017 |
| C  | 5.86545321786715  | 0.64515288674251  | -6.82338960392687 |
| C  | 5.91842652041195  | -0.15371404496274 | -7.96075065643707 |
| H  | 5.00749960546741  | -1.77124799146719 | -9.04004807976066 |
| H  | 3.22842118525070  | -2.11994223193406 | -7.36674588495905 |
| H  | 4.81516821203149  | 1.06623604779366  | -4.99454132295068 |
| H  | 6.60509462041766  | 1.42023981077846  | -6.67169963991324 |
| H  | 6.69927896375805  | 0.00025677204257  | -8.69357729884536 |
| C  | 0.91591493853446  | 2.79776757737039  | -5.37132901830378 |
| C  | 0.13801672926957  | 3.27020543412199  | -6.40894588755081 |
| C  | -0.19846087426551 | 2.42404434016076  | -7.46772131369825 |
| C  | 0.27027464201838  | 1.12392292967961  | -7.43368672509258 |
| C  | 1.34427451776604  | 1.46560751078329  | -5.43087830627680 |
| H  | 1.19962569648645  | 3.41446117119588  | -4.53219850048146 |
| H  | -0.20940645797957 | 4.29442732151000  | -6.39887237521610 |
| H  | -0.80501629683797 | 2.76703882862662  | -8.29257689824745 |
| H  | 0.04016134546524  | 0.42528841892906  | -8.22880402940457 |
| C  | 4.24637086199771  | -1.78874121411834 | -2.99763854314627 |
| C  | 5.06799455885740  | -1.88225557610028 | -1.86730315597413 |
| C  | 5.76042856200531  | -3.05996481993241 | -1.67113816120826 |
| C  | 5.62317724790879  | -4.10787451138239 | -2.58381841568094 |
| C  | 4.78420702998826  | -3.92025677176591 | -3.66638078142869 |
| H  | 5.14037468556690  | -1.04661000460714 | -1.18780788792770 |
| H  | 6.40637280568845  | -3.16823353453304 | -0.81009668802072 |
| H  | 6.15363909117965  | -5.03944935856212 | -2.45587574209069 |
| H  | 4.64145881463000  | -4.69947809980075 | -4.40524927447241 |
| As | 2.48028985371567  | -0.85785420195838 | -4.76886793776475 |
| O  | 3.55816326460017  | -0.67825147771270 | -3.25064861168639 |
| N  | 4.11064094208252  | -2.78521763193674 | -3.87222574560956 |
| N  | 1.02767942573820  | 0.65324573086603  | -6.43898047158645 |
| O  | 2.10379875841014  | 0.94980983370988  | -4.46763929135002 |



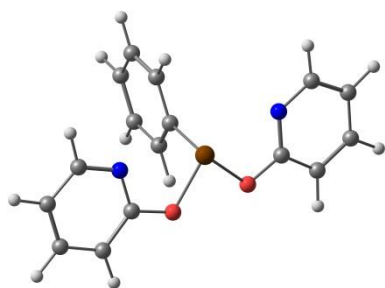

**Figure S41.** Optimized molecular structure of **1<sup>I</sup>**.

Total energy at DFT-B3LYP cc-pVTZ (for C H N O) and SDD (for As) D3BJ COSMO level of theory: -884.081491281782 au.

Gibbs free energy: -883.86915122 kcal mol<sup>-1</sup>

**Table S16.** Atomic coordinates of optimized structure of **1<sup>I</sup>**.

|    |                   |                   |                   |
|----|-------------------|-------------------|-------------------|
| C  | 4.96133062775113  | -1.15024832248384 | -8.14699782125778 |
| C  | 3.95866939899059  | -1.34862964949534 | -7.20503614447722 |
| C  | 3.89855338519439  | -0.55259658627527 | -6.06619760180713 |
| C  | 4.84689086122668  | 0.44621509042386  | -5.86961834808162 |
| C  | 5.85106279484644  | 0.64654476827190  | -6.80965394511964 |
| C  | 5.90872684862119  | -0.15103514084583 | -7.94887080025450 |
| H  | 5.00404481924858  | -1.77083737331261 | -9.03187593819965 |
| H  | 3.22324527267066  | -2.12757482969223 | -7.36266304698489 |
| H  | 4.79782401009884  | 1.06274300306692  | -4.98328210179741 |
| H  | 6.58746142989195  | 1.42387174712927  | -6.65494789721578 |
| H  | 6.69035516071772  | 0.00663282175830  | -8.67992597806318 |
| C  | 0.92424196717189  | 2.79708344729388  | -5.37516812441733 |
| C  | 0.16077964305592  | 3.27785195277030  | -6.42096804831265 |
| C  | -0.17905911785631 | 2.43269728484495  | -7.47994205916444 |
| C  | 0.26935196156258  | 1.12545333544142  | -7.43907095020940 |
| C  | 1.33256743344094  | 1.45936109828189  | -5.42837884163839 |
| H  | 1.20965393696061  | 3.41476799117876  | -4.53722320274380 |
| H  | -0.17140224743880 | 4.30675874986790  | -6.41681633704774 |
| H  | -0.77384014583021 | 2.78205498896720  | -8.31055021659277 |
| H  | 0.03441176883336  | 0.42831565715075  | -8.23350051321612 |
| C  | 4.23589231412397  | -1.79708247304381 | -2.99203734007773 |
| C  | 5.07069941394520  | -1.88017924058185 | -1.87178514022015 |
| C  | 5.77901548604022  | -3.05092064989814 | -1.68388830338439 |
| C  | 5.64268094678466  | -4.10004317493147 | -2.59587957691525 |
| C  | 4.78875546543018  | -3.92323078188798 | -3.66870105421912 |
| H  | 5.14412917603322  | -1.04491792947698 | -1.19180656369479 |
| H  | 6.43624225731614  | -3.15179887120895 | -0.83099164506587 |
| H  | 6.18507399315940  | -5.02546655411464 | -2.47416983030144 |
| H  | 4.64583491877414  | -4.70442906165567 | -4.40483675722751 |
| As | 2.46102413496543  | -0.87643595477055 | -4.76916538362160 |
| O  | 3.53215994057761  | -0.69135318908490 | -3.24120782773965 |
| N  | 4.09940070889404  | -2.79388151947075 | -3.86541919979068 |
| N  | 1.01245791231559  | 0.64710623179786  | -6.43476462515118 |
| O  | 2.08141532248198  | 0.93344711398564  | -4.45753902598915 |



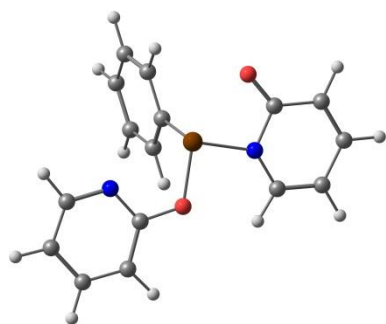

**Figure S42.** Optimized molecular structure of **1<sup>H</sup>**.

Total energy at DFT-B3LYP cc-pVTZ (for C H N O) and SDD (for As) D3BJ level of theory:  
-884.073982164335 au.

Gibbs free energy: -883.86055649 kcal mol<sup>-1</sup>

**Table S17.** Atomic coordinates of optimized structure of **1<sup>H</sup>**.

|    |                   |                  |                   |
|----|-------------------|------------------|-------------------|
| C  | 5.88790088215515  | 1.95798901340592 | -6.34222252757080 |
| C  | 4.76029427527622  | 1.44844313052772 | -5.71082625759675 |
| C  | 4.03343438287211  | 2.24239153198894 | -4.82896659648814 |
| C  | 4.44050207400552  | 3.54900068105797 | -4.58125314869798 |
| C  | 5.56557853708981  | 4.05991822424910 | -5.21556403970969 |
| C  | 6.29183388345919  | 3.26431284780924 | -6.09451145107499 |
| H  | 6.44725098869806  | 1.33778667565142 | -7.02969266899239 |
| H  | 4.43570686478328  | 0.43946705915877 | -5.92254480238325 |
| H  | 3.88094291393549  | 4.16657582979906 | -3.89320511163874 |
| H  | 5.87674003741313  | 5.07775898527495 | -5.02265158117679 |
| H  | 7.16917462356474  | 3.66244249101618 | -6.58581121821104 |
| C  | 0.01426471103873  | 2.44137413083155 | -6.96514519862194 |
| C  | -0.67371923601359 | 3.56577961100249 | -6.60205055624369 |
| C  | -0.45082275947461 | 4.19189089852158 | -5.35579225902878 |
| C  | 0.47166651886307  | 3.64539029581376 | -4.50874070053332 |
| C  | 0.98364789686242  | 1.89038765346063 | -6.07542468030195 |
| H  | -0.13951083051734 | 1.94941165098721 | -7.91312362181452 |
| H  | -1.40321128561626 | 3.98657419224248 | -7.28197976903320 |
| H  | -0.98990629882161 | 5.08063426581481 | -5.06911455303882 |
| H  | 0.70693942844627  | 4.05082029151372 | -3.53757248267520 |
| C  | 3.20726355156712  | 2.47804139486575 | -1.55062564078473 |
| C  | 3.19677606004957  | 3.26827484815582 | -0.39451005217606 |
| C  | 4.09913631008744  | 2.96025863362340 | 0.60417321109609  |
| C  | 4.97684678647734  | 1.88761904463695 | 0.43994493238498  |
| C  | 4.90531820669529  | 1.16459403094674 | -0.73700216443638 |
| H  | 2.49772356306335  | 4.08645737487552 | -0.30792221194289 |
| H  | 4.12181406739199  | 3.54969747906441 | 1.51095017058309  |
| H  | 5.69295847097909  | 1.62333244146416 | 1.20367616180904  |
| H  | 5.56155899142581  | 0.32193659596054 | -0.91649804193318 |
| As | 2.47656747783656  | 1.44030750657263 | -3.93637005940565 |
| O  | 2.36915559450593  | 2.73185915441850 | -2.55662708278942 |
| N  | 4.04213614987071  | 1.45454080967336 | -1.71449186343881 |
| N  | 1.15260617061390  | 2.53763850630643 | -4.86553264058270 |
| O  | 1.71193082141612  | 0.88850910930828 | -6.24818772355140 |

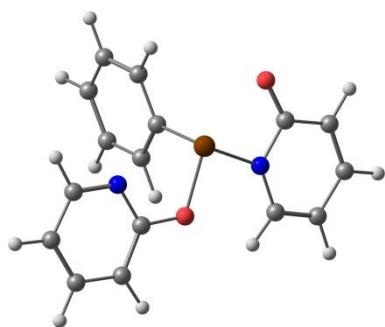

**Figure S43.** Optimized molecular structure of **1<sup>H</sup>**.

Total energy at DFT-B3LYP cc-pVTZ (for C H N O) and SDD (for As) D3BJ COSMO level of theory: -884.084596362769 au.

Gibbs free energy: -883.8720163 kcal mol<sup>-1</sup>

**Table S18.** Atomic coordinates of optimized structure of **1<sup>H</sup>**.

|    |                   |                  |                   |
|----|-------------------|------------------|-------------------|
| C  | 6.00420465266310  | 1.91032017767667 | -6.13097426602554 |
| C  | 4.871110644218977 | 1.38946268913157 | -5.51702429104844 |
| C  | 4.00944203868203  | 2.22431849797427 | -4.81295942489589 |
| C  | 4.28620681696510  | 3.58471990037054 | -4.72253839859329 |
| C  | 5.41766708276792  | 4.10762029243033 | -5.33687643232784 |
| C  | 6.27806275311489  | 3.27069189530626 | -6.04082215894704 |
| H  | 6.67032735585257  | 1.25751842456369 | -6.67857054519837 |
| H  | 4.65745014313476  | 0.33166773867677 | -5.59612540421168 |
| H  | 3.62334982923162  | 4.23511854825951 | -4.16898966455856 |
| H  | 5.62878813993027  | 5.16623990627079 | -5.26596562103867 |
| H  | 7.15899027985613  | 3.67852671943047 | -6.51735841194065 |
| C  | 0.00886781472289  | 2.52166504709814 | -6.98407360817586 |
| C  | -0.67217474700914 | 3.64063476292149 | -6.58867563741655 |
| C  | -0.44964001810411 | 4.21845553332393 | -5.32039318023807 |
| C  | 0.46335788507431  | 3.63379931760561 | -4.48873060519369 |
| C  | 0.96380811384895  | 1.92940163297417 | -6.10868776343440 |
| H  | -0.14526869136885 | 2.06517737145978 | -7.94978724998727 |
| H  | -1.39296371603666 | 4.09143951718874 | -7.25775008294536 |
| H  | -0.98118871508695 | 5.10150641262651 | -5.00377238664345 |
| H  | 0.69472071191273  | 4.00576048942880 | -3.50418951400135 |
| C  | 3.20333042905359  | 2.43685422071267 | -1.56754004452076 |
| C  | 3.23674904848535  | 3.24876180981196 | -0.42794046790491 |
| C  | 4.16345437043012  | 2.94521427696406 | 0.55058637970843  |
| C  | 5.02156898913712  | 1.85683171743926 | 0.38044697717240  |
| C  | 4.90756946219729  | 1.11329773062946 | -0.78015661460336 |
| H  | 2.55395561186600  | 4.07992778040024 | -0.33638757166537 |
| H  | 4.22102408793814  | 3.55061679044227 | 1.44475502273783  |
| H  | 5.75556699285431  | 1.59626487923320 | 1.12816609938108  |
| H  | 5.54704087265890  | 0.25877887589647 | -0.96168758804457 |
| As | 2.44267532980288  | 1.41689670584037 | -3.94563776439755 |
| O  | 2.33774526307664  | 2.68515391296389 | -2.55460872644114 |
| N  | 4.01813800734798  | 1.39828966593198 | -1.73832505065044 |
| N  | 1.13908392237273  | 2.53176205821854 | -4.87962563041714 |
| O  | 1.67748327043760  | 0.91872109079759 | -6.32299660353254 |

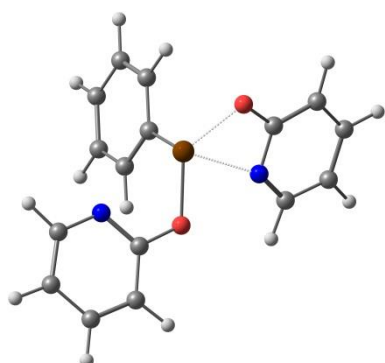

**Figure S44.** Transition state TS1 molecular structure of PhAs(PyO)<sub>2</sub>.

Total energy at DFT-B3LYP cc-pVTZ (for C H N O) and SDD (for As) D3BJ level of theory:  
-884.045153002596 au.

Gibbs free energy: -883.83217237 kcal mol<sup>-1</sup>

**Table S19.** Atomic coordinates of transition state structure of PhAs(PyO)<sub>2</sub>.

|    |                   |                  |                   |
|----|-------------------|------------------|-------------------|
| As | 2.73838984354684  | 1.21742756476864 | -3.71884128622456 |
| O  | 2.50374852960306  | 2.60405793186177 | -2.41058950650238 |
| N  | 4.31568049037217  | 1.53806604103277 | -1.55939948057668 |
| N  | 1.12101341231947  | 2.95415930036602 | -4.70649953691454 |
| O  | 1.56611225302986  | 0.86487233297416 | -5.28480884515724 |
| C  | 5.41973250150465  | 2.18989690537454 | -6.80393725964196 |
| C  | 4.44021414802926  | 1.59397892392225 | -6.01951636699076 |
| C  | 4.05694093458499  | 2.17339402441245 | -4.81081410410348 |
| C  | 4.66812415193230  | 3.35134256471613 | -4.39105420998645 |
| C  | 5.64325756975343  | 3.94900713885783 | -5.17730346599221 |
| C  | 6.02256797854827  | 3.36844424483056 | -6.38300484949698 |
| H  | 5.70874800197006  | 1.73682555098332 | -7.74240826482090 |
| H  | 3.96055260214150  | 0.68647289316127 | -6.35953932886482 |
| H  | 4.36799782185338  | 3.80880094987221 | -3.46120445829438 |
| H  | 6.10757926663968  | 4.86964303770480 | -4.85076473916439 |
| H  | 6.78398118709575  | 3.83552600775791 | -6.99305682478264 |
| C  | 0.11199381388299  | 2.14139442791458 | -6.71582932990579 |
| C  | -0.48104560414001 | 3.37673307476204 | -6.89500816721509 |
| C  | -0.26529863722050 | 4.40512892663346 | -5.97423247524064 |
| C  | 0.55089602756831  | 4.14348797063997 | -4.88766270109564 |
| C  | 0.92561913527765  | 1.97176172643614 | -5.58739582659110 |
| H  | -0.02652006519489 | 1.32752572558918 | -7.41097580080102 |
| H  | -1.11258775468467 | 3.54722254768629 | -7.75686969788351 |
| H  | -0.72090530779222 | 5.37572706359837 | -6.09843908126113 |
| H  | 0.76018294283862  | 4.89285900780020 | -4.13465759478671 |
| C  | 3.29815552115583  | 2.38036954044998 | -1.36586658418832 |
| C  | 3.06882245943696  | 3.01625977311734 | -0.13723051677060 |
| C  | 3.94654544727609  | 2.76023745012373 | 0.89625841806901  |
| C  | 5.00941102893693  | 1.87513332439750 | 0.70165427774825  |
| C  | 5.14361849904893  | 1.28473908779490 | -0.54116497596500 |
| H  | 2.22449232155842  | 3.68029963107946 | -0.02932143590781 |
| H  | 3.80495973302234  | 3.23952181996927 | 1.85565773437391  |

|   |                  |                  |                   |
|---|------------------|------------------|-------------------|
| H | 5.70995952583250 | 1.65355941077473 | 1.49300884626536  |
| H | 5.94756022027202 | 0.58754007863622 | -0.74440056132982 |

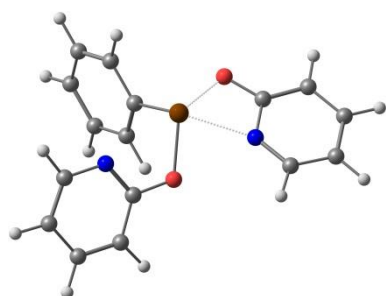

**Figure S45.** Transition state TS2 molecular structure of PhAs(PyO)<sub>2</sub>.

Total energy at DFT-B3LYP cc-pVTZ (for C H N O) and SDD (for As) D3BJ level of theory:  
-884.047806635603 au.

Gibbs free energy: -883.83464963 kcal mol<sup>-1</sup>

**Table S20.** Atomic coordinates of transition state structure of PhAs(PyO)<sub>2</sub>.

|    |                   |                   |                   |
|----|-------------------|-------------------|-------------------|
| As | -0.38510824011027 | -1.03369558224456 | -0.34986543324734 |
| O  | -0.53681524596991 | 0.23578552382928  | 1.06565564770786  |
| N  | 1.03281939205243  | -1.14460172017108 | 1.94710831290685  |
| N  | -2.48753641626025 | -0.13943621503543 | -0.65028295331056 |
| O  | -1.04400133421725 | -0.56440307079280 | -2.23567225353079 |
| C  | 3.38614741172365  | -0.55930916214194 | -2.14919023664968 |
| C  | 2.17099156778296  | -1.04485841174469 | -1.68133083115787 |
| C  | 1.30494729728338  | -0.21809095723094 | -0.97218272305973 |
| C  | 1.66303521526211  | 1.10513682388389  | -0.73891360815252 |
| C  | 2.87445473110737  | 1.59518733170541  | -1.21002043693040 |
| C  | 3.73921003026337  | 0.76375742077165  | -1.91310326753856 |
| H  | 4.05618487205539  | -1.21176556164410 | -2.69320231977192 |
| H  | 1.90409201272310  | -2.07781404363826 | -1.87109628976434 |
| H  | 0.99469427755365  | 1.75156777173203  | -0.18848337237590 |
| H  | 3.14544679848815  | 2.62658021607475  | -1.02732708403080 |
| H  | 4.68428079077425  | 1.14547226449215  | -2.27461495446163 |
| C  | -3.28934803571390 | 0.07163359283411  | -2.88976867802463 |
| C  | -4.51885617644280 | 0.43571871921986  | -2.38063967763641 |
| C  | -4.73231841012820 | 0.50777488746121  | -0.99746187473810 |
| C  | -3.67886935470199 | 0.20413672876456  | -0.15901277986781 |
| C  | -2.26502279309878 | -0.21148330776853 | -1.97072921517688 |
| H  | -3.09754994542340 | 0.00359615258094  | -3.94957348266334 |
| H  | -5.32882691602840 | 0.66773208551215  | -3.05939197064229 |
| H  | -5.68912004102546 | 0.79886380270773  | -0.59208573824279 |
| H  | -3.76262495782552 | 0.24091531169775  | 0.91916902821436  |
| C  | 0.32212015856205  | -0.02195900572997 | 2.04968275606356  |
| C  | 0.45413420228762  | 0.85831974550853  | 3.13231400224115  |
| C  | 1.36033613215638  | 0.53259924338625  | 4.12135815826426  |
| C  | 2.11010201654067  | -0.64062173294969 | 4.01794185305003  |
| C  | 1.90927416004812  | -1.44325595965025 | 2.90944265550307  |
| H  | -0.14212053389285 | 1.75761932419389  | 3.16687985466245  |
| H  | 1.48946051150141  | 1.18875820809397  | 4.97194973463191  |
| H  | 2.82798405535362  | -0.91930113954793 | 4.77489543167468  |

H 2.46620426731925 -2.36295949415995 2.77788826605405

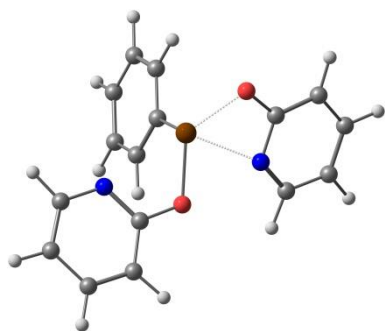

**Figure S46.** Transition state TS1 molecular structure of PhAs(PyO)<sub>2</sub>.

Total energy at DFT-B3LYP cc-pVTZ (for C H N O) and SDD (for As) D3BJ COSMO level of theory: -884.053557073856 au.

Gibbs free energy: -883.84120383 kcal mol<sup>-1</sup>

**Table S21.** Atomic coordinates of transition state structure of PhAs(PyO)<sub>2</sub>.

|    |                   |                  |                   |
|----|-------------------|------------------|-------------------|
| As | 2.72103467438131  | 1.19515068789472 | -3.70603397420912 |
| O  | 2.48056116336684  | 2.57745096468591 | -2.39242377248865 |
| N  | 4.30870367483280  | 1.52060232581996 | -1.56297166554725 |
| N  | 1.11281703509054  | 2.94473266898300 | -4.70074043854028 |
| O  | 1.53435102369313  | 0.84833512379912 | -5.27609871923348 |
| C  | 5.42445154035749  | 2.17140219259804 | -6.77001522445864 |
| C  | 4.45168248709441  | 1.56481216278714 | -5.98378280464809 |
| C  | 4.03262354368250  | 2.16299273318349 | -4.79627009661850 |
| C  | 4.60086634724318  | 3.36976610240798 | -4.39758780586891 |
| C  | 5.57010639264001  | 3.97785440453479 | -5.18430638790365 |
| C  | 5.98484816712386  | 3.37892579857351 | -6.37034313573773 |
| H  | 5.74171255605720  | 1.70391824230806 | -7.69201715912213 |
| H  | 4.00904052956364  | 0.63251955527292 | -6.30590717715122 |
| H  | 4.27222364623231  | 3.84138313299753 | -3.48438614587764 |
| H  | 6.00137552385379  | 4.91985185328187 | -4.87443354001167 |
| H  | 6.74055563097584  | 3.85386833257304 | -6.98118441550715 |
| C  | 0.12296920340025  | 2.15175383076065 | -6.72807248123005 |
| C  | -0.44410224257692 | 3.39869935243049 | -6.91760835857325 |
| C  | -0.22346301150759 | 4.42294165253698 | -5.99281853346054 |
| C  | 0.56916517284475  | 4.14654503961498 | -4.89226954186833 |
| C  | 0.91380621739133  | 1.96786144888542 | -5.58637838226376 |
| H  | -0.01961543929879 | 1.34229164319354 | -7.42772315293474 |
| H  | -1.05722968664683 | 3.58078732439091 | -7.78984509376489 |
| H  | -0.65763501498344 | 5.40224817379610 | -6.12452051625071 |
| H  | 0.77973001687865  | 4.89390531713806 | -4.13797711653429 |
| C  | 3.29303013964157  | 2.36226200458440 | -1.35719971742631 |
| C  | 3.08248622044711  | 3.00648508711643 | -0.13020083406482 |
| C  | 3.97770717237114  | 2.75895249989812 | 0.89118042862239  |
| C  | 5.03948113905078  | 1.87433632382934 | 0.68463769483975  |
| C  | 5.15559212495875  | 1.27537972831719 | -0.55587721196130 |
| H  | 2.24004517465036  | 3.67109504910856 | -0.01081381994843 |
| H  | 3.85086330439075  | 3.24442193806337 | 1.84913306205783  |
| H  | 5.75327414733771  | 1.65944651556412 | 1.46582881678142  |

H 5.95744142546156 0.57843678907026 -0.76619077909589

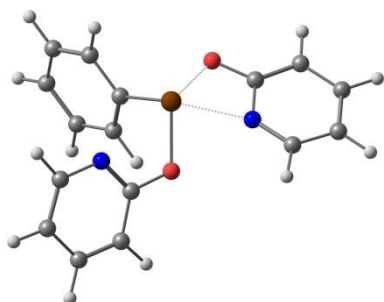

**Figure S47.** Transition state TS2 molecular structure of PhAs(PyO)<sub>2</sub>.

Total energy at DFT-B3LYP cc-pVTZ (for C H N O) and SDD (for As) D3BJ COSMO level of theory: -884.056677270052 au.

Gibbs free energy: -883.84398295 kcal mol<sup>-1</sup>

**Table S22.** Atomic coordinates of transition state structure of PhAs(PyO)<sub>2</sub>.

|    |                   |                   |                   |
|----|-------------------|-------------------|-------------------|
| As | -0.40768721890044 | -1.03286073604630 | -0.36859750628611 |
| O  | -0.55342152515335 | 0.22195534152241  | 1.05802453660303  |
| N  | 1.00129838372062  | -1.17242079589871 | 1.94922200115913  |
| N  | -2.50351605665851 | -0.15171929799255 | -0.66092200107590 |
| O  | -1.04416048603816 | -0.49511348812571 | -2.25047428630497 |
| C  | 3.41131663747310  | -0.57401166323570 | -2.08475596874450 |
| C  | 2.18755375789229  | -1.05821950381922 | -1.63432634537177 |
| C  | 1.30036568009372  | -0.22258958122091 | -0.96167481453446 |
| C  | 1.64630231606159  | 1.10792260356268  | -0.74694550596467 |
| C  | 2.86574870320116  | 1.59687502623315  | -1.20000513104256 |
| C  | 3.75160318974819  | 0.75635552987739  | -1.86741979275022 |
| H  | 4.09751377356408  | -1.23323596377535 | -2.59945494488764 |
| H  | 1.93200968592304  | -2.09696430529157 | -1.80652511690633 |
| H  | 0.96347758763896  | 1.76244253557837  | -0.22425540472648 |
| H  | 3.12661757404923  | 2.63326039023384  | -1.03161722640211 |
| H  | 4.70230147666976  | 1.13679787688398  | -2.21494771699753 |
| C  | -3.29960783486909 | 0.13084027465135  | -2.89369923948794 |
| C  | -4.53875345316684 | 0.45328436146484  | -2.37642478465489 |
| C  | -4.75811007327857 | 0.46692902299560  | -0.99249737386745 |
| C  | -3.70367239056131 | 0.15004326680584  | -0.15991022849520 |
| C  | -2.27789413653655 | -0.16946829039622 | -1.98061943232378 |
| H  | -3.10467380297386 | 0.10737100616426  | -3.95491756877186 |
| H  | -5.34977262367560 | 0.69642498903385  | -3.04926277288531 |
| H  | -5.72193394721800 | 0.72349648177410  | -0.58073131897192 |
| H  | -3.79496052965973 | 0.14105168621492  | 0.91774466843453  |
| C  | 0.31860072887886  | -0.03080255552794 | 2.03450892273998  |
| C  | 0.49030873100065  | 0.87538958628936  | 3.08908650276502  |
| C  | 1.40842443909899  | 0.55714496328762  | 4.07044754430208  |
| C  | 2.13135056639909  | -0.63486615358572 | 3.98446952037650  |
| C  | 1.89212989552890  | -1.46369967913499 | 2.90324556551105  |
| H  | -0.08349634892422 | 1.78949884590230  | 3.11103206926061  |
| H  | 1.56818032940855  | 1.23331437018414  | 4.89935848806455  |
| H  | 2.85790704452659  | -0.90839353955595 | 4.73494480381193  |
| H  | 2.42645292673685  | -2.39843060505315 | 2.78823785842518  |

- Literature

- [1] G. Henkelman, H. Jónsson, *J. Chem. Phys.* 2000, **113**, 9978-9985.
- [2] A. Klamt, G. Schüürmann, *J. Chem. Soc., Perkin Trans.* 1993, **2**, 799-805.
- [3] M. Swart, E. Rösler, F. M. Bickelhaupt, *Eur. J. Inorg. Chem.* 2007, 3646-3654.
- [4] A. Klamt, V. Jonas, T. Bürger, J. C. W. Lohrenz, *J. Phys. Chem. A* 1998, **102**, 5074-5085.
